# Supplementary material for: Current and future goals are represented in opposite patterns in object-selective cortex
Source: eLife journal article supplement (doi:10.7554/elife.38677), 2018-11-05
Supplement: supp [file Figure2_WithinCrossRelevanceDecoding.xlsx]

## Sheet: WithinDecoding
Current																Prospective
	TR1	TR2	TR3	TR4	TR5	TR6	TR1	TR2	TR3	TR4	TR5	TR6	TR7	TR8	TR9		TR1	TR2	TR3	TR4	TR5	TR6	TR1	TR2	TR3	TR4	TR5	TR6	TR7	TR8	TR9	TR1	TR2	TR3	TR4	TR5	TR6	TR1	TR2	TR3	TR4	TR5	TR6	TR7	TR8	TR9
	Cue	D1_1	D1_2	D1_3	D1_4	Search1	D2_1	D2_2	D2_3	D2_4	Search2	D3_1	D3_2	D3_3	D3_4		Cue	D1_1	D1_2	D1_3	D1_4	Search1	D2_1	D2_2	D2_3	D2_4	Search2	D3_1	D3_2	D3_3	D3_4	Cue	D1_1	D1_2	D1_3	D1_4	Search1	D2_1	D2_2	D2_3	D2_4	Search2	D3_1	D3_2	D3_3	D3_4
1	0.354167	0.5	0.6875	0.6875	0.5	0.25	0.520833	0.708333	0.854167	0.520833	0.395833	0.3125	0.4375	0.395833	0.333333		0.375	0.458333	0.666667	0.5625	0.375	0.354167	0.4375	0.416667	0.458333	0.479167	0.375	0.416667	0.6875	0.791667	0.479167	0.333333	0.333333	0.333333	0.333333	0.333333	0.333333	0.333333	0.333333	0.333333	0.333333	0.333333	0.333333	0.333333	0.333333	0.333333
2	0.354167	0.583333	0.520833	0.416667	0.291667	0.354167	0.4375	0.645833	0.5625	0.479167	0.1875	0.3125	0.4375	0.458333	0.5		0.416667	0.5	0.416667	0.4375	0.395833	0.479167	0.4375	0.4375	0.395833	0.416667	0.458333	0.354167	0.666667	0.5	0.3125	0.333333	0.333333	0.333333	0.333333	0.333333	0.333333	0.333333	0.333333	0.333333	0.333333	0.333333	0.333333	0.333333	0.333333	0.333333
3	0.333333	0.395833	0.479167	0.541667	0.375	0.520833	0.4375	0.479167	0.625	0.4375	0.333333	0.354167	0.375	0.375	0.333333		0.229167	0.416667	0.4375	0.4375	0.375	0.458333	0.270833	0.416667	0.375	0.291667	0.333333	0.5	0.541667	0.520833	0.395833	0.333333	0.333333	0.333333	0.333333	0.333333	0.333333	0.333333	0.333333	0.333333	0.333333	0.333333	0.333333	0.333333	0.333333	0.333333
4	0.25	0.458333	0.583333	0.520833	0.479167	0.333333	0.5	0.6875	0.604167	0.458333	0.270833	0.395833	0.291667	0.479167	0.229167		0.229167	0.4375	0.520833	0.479167	0.395833	0.1875	0.166667	0.270833	0.291667	0.270833	0.333333	0.520833	0.75	0.645833	0.645833	0.333333	0.333333	0.333333	0.333333	0.333333	0.333333	0.333333	0.333333	0.333333	0.333333	0.333333	0.333333	0.333333	0.333333	0.333333
5	0.3125	0.333333	0.541667	0.416667	0.333333	0.395833	0.354167	0.395833	0.416667	0.3125	0.291667	0.5	0.375	0.3125	0.229167		0.375	0.416667	0.375	0.479167	0.520833	0.354167	0.291667	0.270833	0.395833	0.458333	0.208333	0.1875	0.291667	0.395833	0.291667	0.333333	0.333333	0.333333	0.333333	0.333333	0.333333	0.333333	0.333333	0.333333	0.333333	0.333333	0.333333	0.333333	0.333333	0.333333
6	0.583333	0.4375	0.5	0.458333	0.5	0.3125	0.354167	0.5	0.395833	0.375	0.520833	0.375	0.375	0.479167	0.3125		0.375	0.416667	0.416667	0.479167	0.4375	0.3125	0.333333	0.375	0.3125	0.416667	0.354167	0.5	0.541667	0.479167	0.4375	0.333333	0.333333	0.333333	0.333333	0.333333	0.333333	0.333333	0.333333	0.333333	0.333333	0.333333	0.333333	0.333333	0.333333	0.333333
7	0.208333	0.583333	0.666667	0.520833	0.375	0.479167	0.354167	0.708333	0.6875	0.416667	0.333333	0.416667	0.375	0.583333	0.375		0.25	0.458333	0.520833	0.291667	0.416667	0.291667	0.354167	0.395833	0.270833	0.208333	0.333333	0.25	0.729167	0.604167	0.5625	0.333333	0.333333	0.333333	0.333333	0.333333	0.333333	0.333333	0.333333	0.333333	0.333333	0.333333	0.333333	0.333333	0.333333	0.333333
8	0.25	0.354167	0.333333	0.375	0.4375	0.354167	0.3125	0.541667	0.520833	0.395833	0.520833	0.4375	0.375	0.416667	0.416667		0.3125	0.3125	0.520833	0.208333	0.229167	0.375	0.208333	0.354167	0.375	0.333333	0.4375	0.4375	0.416667	0.4375	0.291667	0.333333	0.333333	0.333333	0.333333	0.333333	0.333333	0.333333	0.333333	0.333333	0.333333	0.333333	0.333333	0.333333	0.333333	0.333333
9	0.395833	0.4375	0.541667	0.604167	0.604167	0.395833	0.4375	0.520833	0.604167	0.708333	0.5625	0.395833	0.5	0.479167	0.4375		0.208333	0.520833	0.645833	0.645833	0.458333	0.375	0.395833	0.354167	0.541667	0.291667	0.375	0.333333	0.4375	0.770833	0.708333	0.333333	0.333333	0.333333	0.333333	0.333333	0.333333	0.333333	0.333333	0.333333	0.333333	0.333333	0.333333	0.333333	0.333333	0.333333
10	0.541667	0.5	0.604167	0.333333	0.1875	0.270833	0.520833	0.5	0.604167	0.375	0.479167	0.145833	0.354167	0.4375	0.270833		0.208333	0.5	0.479167	0.375	0.145833	0.333333	0.333333	0.375	0.354167	0.333333	0.270833	0.375	0.729167	0.520833	0.395833	0.333333	0.333333	0.333333	0.333333	0.333333	0.333333	0.333333	0.333333	0.333333	0.333333	0.333333	0.333333	0.333333	0.333333	0.333333
11	0.333333	0.416667	0.583333	0.583333	0.333333	0.395833	0.395833	0.729167	0.645833	0.5	0.395833	0.4375	0.5	0.354167	0.375		0.3125	0.395833	0.479167	0.583333	0.270833	0.395833	0.479167	0.3125	0.291667	0.3125	0.395833	0.458333	0.479167	0.666667	0.270833	0.333333	0.333333	0.333333	0.333333	0.333333	0.333333	0.333333	0.333333	0.333333	0.333333	0.333333	0.333333	0.333333	0.333333	0.333333
12	0.395833	0.458333	0.479167	0.375	0.333333	0.416667	0.458333	0.5625	0.4375	0.458333	0.416667	0.3125	0.333333	0.270833	0.354167		0.395833	0.479167	0.5	0.3125	0.3125	0.354167	0.291667	0.375	0.291667	0.4375	0.208333	0.541667	0.479167	0.5	0.479167	0.333333	0.333333	0.333333	0.333333	0.333333	0.333333	0.333333	0.333333	0.333333	0.333333	0.333333	0.333333	0.333333	0.333333	0.333333
13	0.333333	0.625	0.479167	0.291667	0.333333	0.3125	0.4375	0.541667	0.5	0.25	0.333333	0.333333	0.354167	0.479167	0.3125		0.416667	0.375	0.520833	0.354167	0.25	0.333333	0.416667	0.3125	0.291667	0.458333	0.25	0.3125	0.604167	0.625	0.604167	0.333333	0.333333	0.333333	0.333333	0.333333	0.333333	0.333333	0.333333	0.333333	0.333333	0.333333	0.333333	0.333333	0.333333	0.333333
14	0.270833	0.4375	0.479167	0.416667	0.375	0.375	0.541667	0.479167	0.5	0.354167	0.395833	0.3125	0.3125	0.333333	0.25		0.479167	0.333333	0.5	0.375	0.458333	0.354167	0.4375	0.458333	0.416667	0.333333	0.354167	0.375	0.625	0.458333	0.3125	0.333333	0.333333	0.333333	0.333333	0.333333	0.333333	0.333333	0.333333	0.333333	0.333333	0.333333	0.333333	0.333333	0.333333	0.333333
15	0.458333	0.479167	0.645833	0.479167	0.395833	0.479167	0.479167	0.666667	0.4375	0.4375	0.375	0.395833	0.458333	0.479167	0.479167		0.458333	0.583333	0.375	0.333333	0.270833	0.354167	0.354167	0.395833	0.333333	0.375	0.4375	0.5	0.729167	0.520833	0.291667	0.333333	0.333333	0.333333	0.333333	0.333333	0.333333	0.333333	0.333333	0.333333	0.333333	0.333333	0.333333	0.333333	0.333333	0.333333
16	0.395833	0.354167	0.520833	0.416667	0.291667	0.395833	0.4375	0.416667	0.520833	0.479167	0.375	0.229167	0.291667	0.270833	0.479167		0.270833	0.354167	0.583333	0.583333	0.375	0.354167	0.375	0.4375	0.270833	0.25	0.270833	0.25	0.416667	0.583333	0.395833	0.333333	0.333333	0.333333	0.333333	0.333333	0.333333	0.333333	0.333333	0.333333	0.333333	0.333333	0.333333	0.333333	0.333333	0.333333
17	0.3125	0.1875	0.5	0.3125	0.291667	0.270833	0.395833	0.583333	0.666667	0.395833	0.375	0.395833	0.3125	0.395833	0.333333		0.541667	0.395833	0.395833	0.416667	0.270833	0.270833	0.375	0.395833	0.354167	0.291667	0.541667	0.375	0.604167	0.583333	0.479167	0.333333	0.333333	0.333333	0.333333	0.333333	0.333333	0.333333	0.333333	0.333333	0.333333	0.333333	0.333333	0.333333	0.333333	0.333333
18	0.229167	0.395833	0.416667	0.291667	0.375	0.229167	0.5	0.583333	0.479167	0.229167	0.291667	0.291667	0.291667	0.208333	0.375		0.4375	0.541667	0.3125	0.333333	0.291667	0.229167	0.375	0.3125	0.354167	0.416667	0.333333	0.479167	0.583333	0.645833	0.354167	0.333333	0.333333	0.333333	0.333333	0.333333	0.333333	0.333333	0.333333	0.333333	0.333333	0.333333	0.333333	0.333333	0.333333	0.333333
19	0.416667	0.5	0.479167	0.520833	0.5	0.479167	0.4375	0.354167	0.375	0.541667	0.375	0.354167	0.354167	0.416667	0.354167		0.229167	0.416667	0.416667	0.3125	0.291667	0.3125	0.354167	0.208333	0.291667	0.229167	0.5	0.479167	0.479167	0.416667	0.270833	0.333333	0.333333	0.333333	0.333333	0.333333	0.333333	0.333333	0.333333	0.333333	0.333333	0.333333	0.333333	0.333333	0.333333	0.333333
20	0.333333	0.520833	0.625	0.479167	0.333333	0.375	0.395833	0.645833	0.6875	0.354167	0.3125	0.395833	0.4375	0.3125	0.395833		0.270833	0.333333	0.6875	0.458333	0.291667	0.395833	0.416667	0.416667	0.375	0.291667	0.395833	0.4375	0.666667	0.604167	0.333333	0.333333	0.333333	0.333333	0.333333	0.333333	0.333333	0.333333	0.333333	0.333333	0.333333	0.333333	0.333333	0.333333	0.333333	0.333333
21	0.395833	0.395833	0.5	0.416667	0.375	0.3125	0.4375	0.625	0.604167	0.354167	0.375	0.3125	0.25	0.270833	0.395833		0.25	0.3125	0.520833	0.479167	0.208333	0.395833	0.333333	0.4375	0.458333	0.354167	0.354167	0.4375	0.5625	0.645833	0.354167	0.333333	0.333333	0.333333	0.333333	0.333333	0.333333	0.333333	0.333333	0.333333	0.333333	0.333333	0.333333	0.333333	0.333333	0.333333
22	0.416667	0.5	0.458333	0.333333	0.375	0.3125	0.458333	0.604167	0.5	0.333333	0.416667	0.25	0.291667	0.291667	0.291667		0.395833	0.395833	0.375	0.270833	0.416667	0.354167	0.208333	0.208333	0.270833	0.3125	0.25	0.4375	0.604167	0.520833	0.25	0.333333	0.333333	0.333333	0.333333	0.333333	0.333333	0.333333	0.333333	0.333333	0.333333	0.333333	0.333333	0.333333	0.333333	0.333333
23	0.166667	0.4375	0.479167	0.416667	0.541667	0.375	0.3125	0.645833	0.354167	0.520833	0.4375	0.3125	0.354167	0.416667	0.395833		0.479167	0.5625	0.4375	0.375	0.520833	0.208333	0.291667	0.375	0.416667	0.208333	0.229167	0.375	0.354167	0.583333	0.395833	0.333333	0.333333	0.333333	0.333333	0.333333	0.333333	0.333333	0.333333	0.333333	0.333333	0.333333	0.333333	0.333333	0.333333	0.333333
24	0.479167	0.416667	0.666667	0.541667	0.520833	0.3125	0.583333	0.6875	0.416667	0.416667	0.333333	0.25	0.354167	0.270833	0.479167		0.1875	0.458333	0.375	0.375	0.458333	0.4375	0.3125	0.354167	0.458333	0.3125	0.395833	0.416667	0.5625	0.5	0.333333	0.333333	0.333333	0.333333	0.333333	0.333333	0.333333	0.333333	0.333333	0.333333	0.333333	0.333333	0.333333	0.333333	0.333333	0.333333
																	Cue	D1_1	D1_2	D1_3	D1_4	Search1	D2_1	D2_2	D2_3	D2_4	Search2	D3_1	D3_2	D3_3	D3_4
mean	0.355035	0.446181	0.532118	0.447917	0.394097	0.362847	0.4375	0.575521	0.541667	0.421007	0.37934	0.342882	0.366319	0.382812	0.362847	mean	0.337674	0.432292	0.478299	0.414931	0.351562	0.344618	0.34375	0.361111	0.360243	0.336806	0.349826	0.40625	0.564236	0.563368	0.40191
SE	0.0206239	0.018765	0.0176001	0.0210959	0.0199431	0.0156082	0.0143529	0.0213851	0.0247013	0.0207569	0.0174205	0.01596	0.0136749	0.0190929	0.0160062	SE	0.0211323	0.0156752	0.0199653	0.022289	0.0205411	0.0145693	0.0161569	0.0141691	0.0148631	0.0163344	0.0181716	0.0186845	0.0256052	0.020738	0.0256532
ttest	0.303618	3.92566e-06	7.33261e-11	1.60954e-05	0.00572318	0.0712978	2.18707e-07	6.95412e-11	1.71205e-08	0.000322321	0.0146029	0.555498	0.0242363	0.0163176	0.0781181	ttest	0.839078	1.92643e-06	2.17075e-07	0.00130057	0.384025	0.446491	0.525488	0.0621661	0.0833025	0.833534	0.373486	0.000716398	5.17921e-09	1.04411e-10	0.0135784
TTEstCurPros	0.607488	0.531329	0.0253199	0.129557	0.0459702	0.333253	0.00010771	4.11277e-09	5.9589e-07	0.0122791	0.266943	0.0199837	6.12572e-07	7.14468e-07	0.237045		Cue	D1_1	D1_2	D1_3	D1_4	Search1	D2_1	D2_2	D2_3	D2_4	Search2	D3_1	D3_2	D3_3	D3_4
	TR1	TR2	TR3	TR4	TR5	TR6	TR1	TR2	TR3	TR4	TR5	TR6	TR7	TR8	TR9
	Cue	D1_1	D1_2	D1_3	D1_4	Search1	D2_1	D2_2	D2_3	D2_4	Search2	D3_1	D3_2	D3_3	D3_4
Current	0.355035	0.446181	0.532118	0.447917	0.394097	0.362847	0.4375	0.575521	0.541667	0.421007	0.37934	0.342882	0.366319	0.382812	0.362847
Pros	0.337674	0.432292	0.478299	0.414931	0.351562	0.344618	0.34375	0.361111	0.360243	0.336806	0.349826	0.40625	0.564236	0.563368	0.40191
CurrSe	0.0206239	0.018765	0.0176001	0.0210959	0.0199431	0.0156082	0.0143529	0.0213851	0.0247013	0.0207569	0.0174205	0.01596	0.0136749	0.0190929	0.0160062
ProsSe	0.0211323	0.0156752	0.0199653	0.022289	0.0205411	0.0145693	0.0161569	0.0141691	0.0148631	0.0163344	0.0181716	0.0186845	0.0256052	0.020738	0.0256532
														Current			Pros										Current			Pros			Difference Current- Prospective
													meanTR234	Delay	Search1	Search2	Delay	Search1	Search2							meanTR234	Delay	Search1	Search2	Delay	Search1	Search2	Delay	Search1	Search2
													1	0.625	0.694444	0.388889	0.534722	0.451389	0.652778	0.333333	0.333333	0.333333	0.333333	0.333333	0.333333		0.291667	0.361111	0.0555556	0.201389	0.118056	0.319444	0.0902778	0.243056	-0.263889
													2	0.409722	0.5625	0.465278	0.416667	0.416667	0.493056	0.333333	0.333333	0.333333	0.333333	0.333333	0.333333		0.0763889	0.229167	0.131944	0.0833333	0.0833333	0.159722	-0.00694444	0.145833	-0.0277778
													3	0.465278	0.513889	0.361111	0.416667	0.361111	0.486111	0.333333	0.333333	0.333333	0.333333	0.333333	0.333333		0.131944	0.180556	0.0277778	0.0833333	0.0277778	0.152778	0.0486111	0.152778	-0.125
													4	0.527778	0.583333	0.333333	0.465278	0.277778	0.680556	0.333333	0.333333	0.333333	0.333333	0.333333	0.333333		0.194444	0.25	3.33333e-09	0.131944	-0.0555556	0.347222	0.0625	0.305556	-0.347222
													5	0.430556	0.375	0.305556	0.458333	0.375	0.326389	0.333333	0.333333	0.333333	0.333333	0.333333	0.333333		0.0972222	0.0416667	-0.0277778	0.125	0.0416667	-0.00694444	-0.0277778	0	-0.0208333
													6	0.486111	0.423611	0.388889	0.444444	0.368056	0.486111	0.333333	0.333333	0.333333	0.333333	0.333333	0.333333		0.152778	0.0902778	0.0555556	0.111111	0.0347222	0.152778	0.0416667	0.0555556	-0.0972222
													7	0.520833	0.604167	0.444444	0.409722	0.291667	0.631944	0.333333	0.333333	0.333333	0.333333	0.333333	0.333333		0.1875	0.270833	0.111111	0.0763889	-0.0416667	0.298611	0.111111	0.3125	-0.1875
													8	0.381944	0.486111	0.402778	0.319444	0.354167	0.381944	0.333333	0.333333	0.333333	0.333333	0.333333	0.333333		0.0486111	0.152778	0.0694444	-0.0138889	0.0208333	0.0486111	0.0625	0.131944	0.0208333
													9	0.583333	0.611111	0.472222	0.583333	0.395833	0.638889	0.333333	0.333333	0.333333	0.333333	0.333333	0.333333		0.25	0.277778	0.138889	0.25	0.0625	0.305556	0	0.215278	-0.166667
													10	0.375	0.493056	0.354167	0.333333	0.354167	0.548611	0.333333	0.333333	0.333333	0.333333	0.333333	0.333333		0.0416667	0.159722	0.0208333	3.33333e-09	0.0208333	0.215278	0.0416667	0.138889	-0.194444
													11	0.5	0.625	0.409722	0.444444	0.305556	0.472222	0.333333	0.333333	0.333333	0.333333	0.333333	0.333333		0.166667	0.291667	0.0763889	0.111111	-0.0277778	0.138889	0.0555556	0.319444	-0.0625
													12	0.395833	0.486111	0.319444	0.375	0.368056	0.486111	0.333333	0.333333	0.333333	0.333333	0.333333	0.333333		0.0625	0.152778	-0.0138889	0.0416667	0.0347222	0.152778	0.0208333	0.118056	-0.166667
													13	0.368056	0.430556	0.381944	0.375	0.354167	0.611111	0.333333	0.333333	0.333333	0.333333	0.333333	0.333333		0.0347222	0.0972222	0.0486111	0.0416667	0.0208333	0.277778	-0.00694444	0.0763889	-0.229167
													14	0.423611	0.444444	0.298611	0.444444	0.402778	0.465278	0.333333	0.333333	0.333333	0.333333	0.333333	0.333333		0.0902778	0.111111	-0.0347222	0.111111	0.0694444	0.131944	-0.0208333	0.0416667	-0.166667
													15	0.506944	0.513889	0.472222	0.326389	0.368056	0.513889	0.333333	0.333333	0.333333	0.333333	0.333333	0.333333		0.173611	0.180556	0.138889	-0.00694444	0.0347222	0.180556	0.180556	0.145833	-0.0416667
													16	0.409722	0.472222	0.347222	0.513889	0.319444	0.465278	0.333333	0.333333	0.333333	0.333333	0.333333	0.333333		0.0763889	0.138889	0.0138889	0.180556	-0.0138889	0.131944	-0.104167	0.152778	-0.118056
													17	0.368056	0.548611	0.347222	0.361111	0.347222	0.555556	0.333333	0.333333	0.333333	0.333333	0.333333	0.333333		0.0347222	0.215278	0.0138889	0.0277778	0.0138889	0.222222	0.00694444	0.201389	-0.208333
													18	0.361111	0.430556	0.291667	0.3125	0.361111	0.527778	0.333333	0.333333	0.333333	0.333333	0.333333	0.333333		0.0277778	0.0972222	-0.0416667	-0.0208333	0.0277778	0.194444	0.0486111	0.0694444	-0.236111
													19	0.5	0.423611	0.375	0.340278	0.243056	0.388889	0.333333	0.333333	0.333333	0.333333	0.333333	0.333333		0.166667	0.0902778	0.0416667	0.00694445	-0.0902778	0.0555556	0.159722	0.180556	-0.0138889
													20	0.479167	0.5625	0.381944	0.479167	0.361111	0.534722	0.333333	0.333333	0.333333	0.333333	0.333333	0.333333		0.145833	0.229167	0.0486111	0.145833	0.0277778	0.201389	0	0.201389	-0.152778
													21	0.430556	0.527778	0.305556	0.402778	0.416667	0.520833	0.333333	0.333333	0.333333	0.333333	0.333333	0.333333		0.0972222	0.194444	-0.0277778	0.0694444	0.0833333	0.1875	0.0277778	0.111111	-0.215278
													22	0.388889	0.479167	0.291667	0.354167	0.263889	0.458333	0.333333	0.333333	0.333333	0.333333	0.333333	0.333333		0.0555556	0.145833	-0.0416667	0.0208333	-0.0694444	0.125	0.0347222	0.215278	-0.166667
													23	0.479167	0.506944	0.388889	0.444444	0.333333	0.444444	0.333333	0.333333	0.333333	0.333333	0.333333	0.333333		0.145833	0.173611	0.0555556	0.111111	3.33333e-09	0.111111	0.0347222	0.173611	-0.0555556
													24	0.576389	0.506944	0.368056	0.402778	0.375	0.465278	0.333333	0.333333	0.333333	0.333333	0.333333	0.333333		0.243056	0.173611	0.0347222	0.0694444	0.0416667	0.131944	0.173611	0.131944	-0.0972222
													mean	0.458044	0.512731	0.37066	0.414931	0.35272	0.509838							mean	0.124711	0.179398	0.0373264	0.0815972	0.0193866	0.176505	0.0431134	0.160012	-0.139178
													SE	0.0152471	0.0155095	0.0113002	0.0143909	0.0101789	0.0179057							Stdev	0.0746952	0.0759806	0.0553594	0.0705007	0.0498664	0.0877196	0.065625	0.0832195	0.090833
													Ttest	2.92619e-08	4.58563e-11	0.00310646	8.99449e-06	0.0694166	1.00161e-09
													TestCurr_Pros	0.00380683	2.33338e-09	1.25646e-07										Cohen's d'	1.66959	2.3611	0.674255	1.1574	0.38877	2.01215	0.656966	1.92277	-1.53224
													stdev					SubtractMean
														MeanCurrentProspective				Current			Pros
													meanTR234	Delay	Search1	Search2		Delay	Search1	Search2	Delay	Search1	Search2
										Confidence Intervals			1	0.579861	0.572917	0.520833		0.0451389	0.121528	-0.131944	-0.0451389	-0.121528	0.131944
										Cousineau (2005)			2	0.413194	0.489583	0.479167		-0.00347222	0.0729167	-0.0138889	0.00347222	-0.0729167	0.0138889
													3	0.440972	0.4375	0.423611		0.0243056	0.0763889	-0.0625	-0.0243056	-0.0763889	0.0625
													4	0.496528	0.430556	0.506944		0.03125	0.152778	-0.173611	-0.03125	-0.152778	0.173611
													5	0.444444	0.375	0.315972		-0.0138889	0	-0.0104167	0.0138889	0	0.0104167
													6	0.465278	0.395833	0.4375		0.0208333	0.0277778	-0.0486111	-0.0208333	-0.0277778	0.0486111
													7	0.465278	0.447917	0.538194		0.0555556	0.15625	-0.09375	-0.0555556	-0.15625	0.09375
													8	0.350694	0.420139	0.392361		0.03125	0.0659722	0.0104167	-0.03125	-0.0659722	-0.0104167
													9	0.583333	0.503472	0.555556		0	0.107639	-0.0833333	0	-0.107639	0.0833333
													10	0.354167	0.423611	0.451389		0.0208333	0.0694444	-0.0972222	-0.0208333	-0.0694444	0.0972222
													11	0.472222	0.465278	0.440972		0.0277778	0.159722	-0.03125	-0.0277778	-0.159722	0.03125
													12	0.385417	0.427083	0.402778		0.0104167	0.0590278	-0.0833333	-0.0104167	-0.0590278	0.0833333
													13	0.371528	0.392361	0.496528		-0.00347222	0.0381944	-0.114583	0.00347222	-0.0381944	0.114583
													14	0.434028	0.423611	0.381944		-0.0104167	0.0208333	-0.0833333	0.0104167	-0.0208333	0.0833333
													15	0.416667	0.440972	0.493056		0.0902778	0.0729167	-0.0208333	-0.0902778	-0.0729167	0.0208333
													16	0.461806	0.395833	0.40625		-0.0520833	0.0763889	-0.0590278	0.0520833	-0.0763889	0.0590278
													17	0.364583	0.447917	0.451389		0.00347222	0.100694	-0.104167	-0.00347222	-0.100694	0.104167
													18	0.336806	0.395833	0.409722		0.0243056	0.0347222	-0.118056	-0.0243056	-0.0347222	0.118056
													19	0.420139	0.333333	0.381944		0.0798611	0.0902778	-0.00694444	-0.0798611	-0.0902778	0.00694444
													20	0.479167	0.461806	0.458333		0	0.100694	-0.0763889	0	-0.100694	0.0763889
													21	0.416667	0.472222	0.413194		0.0138889	0.0555556	-0.107639	-0.0138889	-0.0555556	0.107639
													22	0.371528	0.371528	0.375		0.0173611	0.107639	-0.0833333	-0.0173611	-0.107639	0.0833333
													23	0.461806	0.420139	0.416667		0.0173611	0.0868056	-0.0277778	-0.0173611	-0.0868056	0.0277778
													24	0.489583	0.440972	0.416667		0.0868056	0.0659722	-0.0486111	-0.0868056	-0.0659722	0.0486111
																	mean	0.0215567	0.0800058	-0.0695891	-0.0215567	-0.0800058	0.0695891
																	mean/2	0.0107784	0.0400029	-0.0347946	-0.0107784	-0.0400029	0.0347946

## Sheet: CrossDecoding
PC	Current																Prospective
		TR1	TR2	TR3	TR4	TR5	TR6	TR1	TR2	TR3	TR4	TR5	TR6	TR7	TR8	TR9		TR1	TR2	TR3	TR4	TR5	TR6	TR1	TR2	TR3	TR4	TR5	TR6	TR7	TR8	TR9	TR1	TR2	TR3	TR4	TR5	TR6	TR1	TR2	TR3	TR4	TR5	TR6	TR7	TR8	TR9
		Cue	D1_1	D1_2	D1_3	D1_4	Search1	D2_1	D2_2	D2_3	D2_4	Search2	D3_1	D3_2	D3_3	D3_4		Cue	D1_1	D1_2	D1_3	D1_4	Search1	D2_1	D2_2	D2_3	D2_4	Search2	D3_1	D3_2	D3_3	D3_4	Cue	D1_1	D1_2	D1_3	D1_4	Search1	D2_1	D2_2	D2_3	D2_4	Search2	D3_1	D3_2	D3_3	D3_4
	1	0.3125	0.479167	0.666667	0.541667	0.416667	0.333333	0.125	0.1875	0.229167	0.166667	0.333333	0.3125	0.208333	0.270833	0.229167		0.270833	0.416667	0.6875	0.479167	0.395833	0.25	0.166667	0.145833	0.208333	0.208333	0.354167	0.270833	0.166667	0.291667	0.291667	0.333333	0.333333	0.333333	0.333333	0.333333	0.333333	0.333333	0.333333	0.333333	0.333333	0.333333	0.333333	0.333333	0.333333	0.333333
	2	0.354167	0.520833	0.458333	0.416667	0.4375	0.3125	0.354167	0.3125	0.395833	0.291667	0.354167	0.3125	0.291667	0.270833	0.291667		0.395833	0.541667	0.479167	0.395833	0.458333	0.3125	0.395833	0.25	0.270833	0.375	0.270833	0.375	0.229167	0.3125	0.354167	0.333333	0.333333	0.333333	0.333333	0.333333	0.333333	0.333333	0.333333	0.333333	0.333333	0.333333	0.333333	0.333333	0.333333	0.333333
	3	0.291667	0.4375	0.645833	0.583333	0.3125	0.375	0.375	0.229167	0.4375	0.416667	0.208333	0.375	0.333333	0.3125	0.3125		0.395833	0.416667	0.520833	0.520833	0.333333	0.270833	0.4375	0.354167	0.333333	0.375	0.4375	0.354167	0.270833	0.291667	0.395833	0.333333	0.333333	0.333333	0.333333	0.333333	0.333333	0.333333	0.333333	0.333333	0.333333	0.333333	0.333333	0.333333	0.333333	0.333333
	4	0.333333	0.541667	0.666667	0.645833	0.4375	0.291667	0.375	0.333333	0.395833	0.479167	0.333333	0.416667	0.208333	0.291667	0.354167		0.333333	0.479167	0.5625	0.479167	0.4375	0.291667	0.375	0.291667	0.3125	0.395833	0.291667	0.375	0.270833	0.166667	0.375	0.333333	0.333333	0.333333	0.333333	0.333333	0.333333	0.333333	0.333333	0.333333	0.333333	0.333333	0.333333	0.333333	0.333333	0.333333
	5	0.4375	0.375	0.333333	0.354167	0.395833	0.4375	0.333333	0.333333	0.354167	0.4375	0.333333	0.229167	0.375	0.229167	0.4375		0.416667	0.291667	0.541667	0.458333	0.479167	0.333333	0.375	0.395833	0.270833	0.333333	0.333333	0.4375	0.375	0.333333	0.375	0.333333	0.333333	0.333333	0.333333	0.333333	0.333333	0.333333	0.333333	0.333333	0.333333	0.333333	0.333333	0.333333	0.333333	0.333333
	6	0.333333	0.416667	0.541667	0.395833	0.354167	0.4375	0.3125	0.270833	0.3125	0.416667	0.4375	0.375	0.25	0.3125	0.291667		0.229167	0.416667	0.5	0.5	0.3125	0.375	0.208333	0.291667	0.229167	0.270833	0.4375	0.354167	0.25	0.333333	0.3125	0.333333	0.333333	0.333333	0.333333	0.333333	0.333333	0.333333	0.333333	0.333333	0.333333	0.333333	0.333333	0.333333	0.333333	0.333333
	7	0.3125	0.541667	0.5625	0.229167	0.354167	0.3125	0.229167	0.145833	0.375	0.270833	0.4375	0.416667	0.291667	0.291667	0.375		0.3125	0.520833	0.479167	0.291667	0.395833	0.3125	0.354167	0.1875	0.354167	0.270833	0.291667	0.395833	0.25	0.333333	0.354167	0.333333	0.333333	0.333333	0.333333	0.333333	0.333333	0.333333	0.333333	0.333333	0.333333	0.333333	0.333333	0.333333	0.333333	0.333333
	8	0.395833	0.479167	0.395833	0.541667	0.375	0.291667	0.395833	0.208333	0.229167	0.354167	0.458333	0.1875	0.1875	0.3125	0.3125		0.416667	0.333333	0.5625	0.458333	0.395833	0.270833	0.395833	0.270833	0.3125	0.354167	0.354167	0.208333	0.145833	0.270833	0.3125	0.333333	0.333333	0.333333	0.333333	0.333333	0.333333	0.333333	0.333333	0.333333	0.333333	0.333333	0.333333	0.333333	0.333333	0.333333
	9	0.479167	0.416667	0.583333	0.645833	0.416667	0.4375	0.25	0.208333	0.1875	0.25	0.25	0.3125	0.25	0.125	0.1875		0.354167	0.5	0.5625	0.583333	0.458333	0.520833	0.333333	0.3125	0.208333	0.3125	0.354167	0.375	0.104167	0.166667	0.229167	0.333333	0.333333	0.333333	0.333333	0.333333	0.333333	0.333333	0.333333	0.333333	0.333333	0.333333	0.333333	0.333333	0.333333	0.333333
	10	0.375	0.458333	0.520833	0.395833	0.270833	0.416667	0.333333	0.145833	0.291667	0.3125	0.375	0.354167	0.125	0.208333	0.229167		0.4375	0.5	0.5	0.354167	0.333333	0.333333	0.416667	0.229167	0.3125	0.375	0.333333	0.229167	0.208333	0.25	0.333333	0.333333	0.333333	0.333333	0.333333	0.333333	0.333333	0.333333	0.333333	0.333333	0.333333	0.333333	0.333333	0.333333	0.333333	0.333333
	11	0.416667	0.333333	0.5	0.5	0.4375	0.3125	0.3125	0.395833	0.25	0.375	0.3125	0.354167	0.270833	0.291667	0.291667		0.395833	0.354167	0.479167	0.479167	0.354167	0.416667	0.1875	0.354167	0.3125	0.354167	0.333333	0.333333	0.1875	0.25	0.395833	0.333333	0.333333	0.333333	0.333333	0.333333	0.333333	0.333333	0.333333	0.333333	0.333333	0.333333	0.333333	0.333333	0.333333	0.333333
	12	0.3125	0.5	0.4375	0.354167	0.416667	0.395833	0.354167	0.229167	0.3125	0.333333	0.291667	0.416667	0.270833	0.375	0.166667		0.333333	0.4375	0.4375	0.291667	0.458333	0.458333	0.3125	0.270833	0.354167	0.354167	0.1875	0.3125	0.354167	0.375	0.333333	0.333333	0.333333	0.333333	0.333333	0.333333	0.333333	0.333333	0.333333	0.333333	0.333333	0.333333	0.333333	0.333333	0.333333	0.333333
	13	0.395833	0.4375	0.479167	0.4375	0.354167	0.291667	0.270833	0.229167	0.3125	0.270833	0.395833	0.375	0.1875	0.354167	0.4375		0.4375	0.5	0.4375	0.395833	0.291667	0.354167	0.333333	0.3125	0.3125	0.270833	0.395833	0.375	0.166667	0.208333	0.541667	0.333333	0.333333	0.333333	0.333333	0.333333	0.333333	0.333333	0.333333	0.333333	0.333333	0.333333	0.333333	0.333333	0.333333	0.333333
	14	0.3125	0.520833	0.645833	0.4375	0.375	0.291667	0.270833	0.229167	0.1875	0.3125	0.270833	0.208333	0.166667	0.3125	0.270833		0.3125	0.458333	0.520833	0.416667	0.270833	0.416667	0.25	0.25	0.1875	0.291667	0.354167	0.3125	0.333333	0.354167	0.3125	0.333333	0.333333	0.333333	0.333333	0.333333	0.333333	0.333333	0.333333	0.333333	0.333333	0.333333	0.333333	0.333333	0.333333	0.333333
	15	0.479167	0.5625	0.520833	0.479167	0.3125	0.333333	0.270833	0.166667	0.333333	0.3125	0.375	0.0833333	0.1875	0.229167	0.479167		0.4375	0.625	0.5625	0.375	0.270833	0.333333	0.333333	0.25	0.395833	0.354167	0.354167	0.104167	0.25	0.3125	0.375	0.333333	0.333333	0.333333	0.333333	0.333333	0.333333	0.333333	0.333333	0.333333	0.333333	0.333333	0.333333	0.333333	0.333333	0.333333
	16	0.333333	0.229167	0.520833	0.458333	0.395833	0.270833	0.333333	0.208333	0.291667	0.25	0.291667	0.395833	0.375	0.291667	0.1875		0.333333	0.375	0.583333	0.479167	0.333333	0.25	0.395833	0.145833	0.25	0.208333	0.270833	0.333333	0.375	0.25	0.166667	0.333333	0.333333	0.333333	0.333333	0.333333	0.333333	0.333333	0.333333	0.333333	0.333333	0.333333	0.333333	0.333333	0.333333	0.333333
	17	0.333333	0.375	0.458333	0.4375	0.354167	0.291667	0.4375	0.208333	0.166667	0.354167	0.270833	0.3125	0.270833	0.375	0.354167		0.333333	0.395833	0.4375	0.3125	0.3125	0.333333	0.354167	0.208333	0.25	0.416667	0.333333	0.208333	0.3125	0.208333	0.354167	0.333333	0.333333	0.333333	0.333333	0.333333	0.333333	0.333333	0.333333	0.333333	0.333333	0.333333	0.333333	0.333333	0.333333	0.333333
	18	0.395833	0.375	0.541667	0.4375	0.395833	0.416667	0.354167	0.291667	0.291667	0.25	0.333333	0.416667	0.395833	0.270833	0.375		0.291667	0.395833	0.520833	0.458333	0.270833	0.3125	0.375	0.229167	0.291667	0.229167	0.375	0.333333	0.3125	0.3125	0.395833	0.333333	0.333333	0.333333	0.333333	0.333333	0.333333	0.333333	0.333333	0.333333	0.333333	0.333333	0.333333	0.333333	0.333333	0.333333
	19	0.229167	0.416667	0.520833	0.604167	0.416667	0.3125	0.354167	0.270833	0.291667	0.354167	0.3125	0.375	0.4375	0.3125	0.270833		0.354167	0.416667	0.5625	0.541667	0.395833	0.208333	0.375	0.3125	0.208333	0.375	0.333333	0.375	0.354167	0.208333	0.333333	0.333333	0.333333	0.333333	0.333333	0.333333	0.333333	0.333333	0.333333	0.333333	0.333333	0.333333	0.333333	0.333333	0.333333	0.333333
	20	0.4375	0.5	0.625	0.3125	0.375	0.5	0.208333	0.166667	0.166667	0.270833	0.25	0.229167	0.208333	0.1875	0.166667		0.416667	0.479167	0.5625	0.5	0.3125	0.270833	0.375	0.25	0.1875	0.3125	0.291667	0.1875	0.1875	0.291667	0.3125	0.333333	0.333333	0.333333	0.333333	0.333333	0.333333	0.333333	0.333333	0.333333	0.333333	0.333333	0.333333	0.333333	0.333333	0.333333
	21	0.375	0.416667	0.5	0.354167	0.270833	0.354167	0.229167	0.25	0.25	0.270833	0.270833	0.333333	0.1875	0.270833	0.25		0.291667	0.4375	0.4375	0.416667	0.354167	0.354167	0.395833	0.229167	0.395833	0.333333	0.229167	0.270833	0.145833	0.291667	0.25	0.333333	0.333333	0.333333	0.333333	0.333333	0.333333	0.333333	0.333333	0.333333	0.333333	0.333333	0.333333	0.333333	0.333333	0.333333
	22	0.395833	0.583333	0.5625	0.3125	0.104167	0.395833	0.291667	0.270833	0.395833	0.4375	0.354167	0.3125	0.291667	0.208333	0.354167		0.416667	0.541667	0.5	0.3125	0.3125	0.354167	0.291667	0.229167	0.291667	0.375	0.416667	0.270833	0.291667	0.333333	0.25	0.333333	0.333333	0.333333	0.333333	0.333333	0.333333	0.333333	0.333333	0.333333	0.333333	0.333333	0.333333	0.333333	0.333333	0.333333
	23	0.3125	0.458333	0.458333	0.4375	0.3125	0.291667	0.3125	0.354167	0.1875	0.333333	0.208333	0.416667	0.1875	0.291667	0.395833		0.458333	0.354167	0.395833	0.395833	0.229167	0.208333	0.375	0.291667	0.333333	0.291667	0.229167	0.395833	0.25	0.270833	0.25	0.333333	0.333333	0.333333	0.333333	0.333333	0.333333	0.333333	0.333333	0.333333	0.333333	0.333333	0.333333	0.333333	0.333333	0.333333
	24	0.333333	0.583333	0.479167	0.4375	0.416667	0.333333	0.1875	0.4375	0.354167	0.291667	0.375	0.416667	0.395833	0.395833	0.375		0.416667	0.5625	0.479167	0.375	0.3125	0.291667	0.291667	0.333333	0.333333	0.270833	0.25	0.395833	0.3125	0.458333	0.3125	0.333333	0.333333	0.333333	0.333333	0.333333	0.333333	0.333333	0.333333	0.333333	0.333333	0.333333	0.333333	0.333333	0.333333	0.333333
	mean	0.361979	0.456597	0.526042	0.447917	0.362847	0.351562	0.302951	0.253472	0.291667	0.325521	0.326389	0.330729	0.264757	0.282986	0.30816	mean	0.366319	0.447917	0.513021	0.427951	0.353299	0.326389	0.337674	0.266493	0.288194	0.321181	0.325521	0.315972	0.25434	0.286458	0.329861
	SE	0.0124655	0.0172817	0.0173422	0.0217203	0.015148	0.0129299	0.0148367	0.0156961	0.0163023	0.0151945	0.0139454	0.0178808	0.0172618	0.0128448	0.0179977	SE	0.0126598	0.0163504	0.0129603	0.0163494	0.0142693	0.0152386	0.0147303	0.0127873	0.0125819	0.0120227	0.0133193	0.0166679	0.01596	0.0137514	0.0150308
	ttest	0.0309894	2.89711e-07	1.00861e-10	2.36173e-05	0.0636722	0.171959	0.0521713	3.7516e-05	0.017667	0.612055	0.623247	0.885489	0.000601964	0.000686657	0.175244	ttest	0.0158102	3.84356e-07	1.17619e-12	6.7702e-06	0.175097	0.652885	0.770887	2.66052e-05	0.00155672	0.322632	0.563234	0.308437	5.28792e-05	0.0024071	0.819369
	TTEstCurPros	0.763292	0.51753	0.431026	0.233728	0.546772	0.143837	0.0323002	0.338449	0.826331	0.718539	0.959124	0.326	0.481853	0.830047	0.194226		Cue	D1_1	D1_2	D1_3	D1_4	Search1	D2_1	D2_2	D2_3	D2_4	Search2	D3_1	D3_2	D3_3	D3_4
		TR1	TR2	TR3	TR4	TR5	TR6	TR1	TR2	TR3	TR4	TR5	TR6	TR7	TR8	TR9
		Cue	D1_1	D1_2	D1_3	D1_4	Search1	D2_1	D2_2	D2_3	D2_4	Search2	D3_1	D3_2	D3_3	D3_4
	PC	0.361979	0.456597	0.526042	0.447917	0.362847	0.351562	0.302951	0.253472	0.291667	0.325521	0.326389	0.330729	0.264757	0.282986	0.30816
	CP	0.366319	0.447917	0.513021	0.427951	0.353299	0.326389	0.337674	0.266493	0.288194	0.321181	0.325521	0.315972	0.25434	0.286458	0.329861
	PCSE	0.0124655	0.0172817	0.0173422	0.0217203	0.015148	0.0129299	0.0148367	0.0156961	0.0163023	0.0151945	0.0139454	0.0178808	0.0172618	0.0128448	0.0179977
	CPSE	0.0126598	0.0163504	0.0129603	0.0163494	0.0142693	0.0152386	0.0147303	0.0127873	0.0125819	0.0120227	0.0133193	0.0166679	0.01596	0.0137514	0.0150308
																															DIFFERENCE
															PC			CP									MEANCPPC				PC			CP			Difference Current- Prospective			MEANCPPC
														meanTR234	Delay	Search1	Search2	Delay	Search1	Search2							Delay	Search1	Search2	meanTR234	Delay	Search1	Search2	Delay	Search1	Search2	Delay	Search1	Search2	Delay	Search1	Search2
														1	0.541667	0.194444	0.236111	0.520833	0.1875	0.25	0.333333	0.333333	0.333333	0.333333	0.333333	0.333333	0.53125	0.190972	0.243056		0.208334	-0.138889	-0.0972219	0.1875	-0.145833	-0.083333	0.0208333	0.00694444	-0.0138889	0.197917	-0.142361	-0.0902774
														2	0.4375	0.333333	0.284722	0.444444	0.298611	0.298611	0.333333	0.333333	0.333333	0.333333	0.333333	0.333333	0.440972	0.315972	0.291667		0.104167	3.33333e-07	-0.0486108	0.111111	-0.0347219	-0.0347219	-0.00694444	0.0347222	-0.0138889	0.107639	-0.0173608	-0.0416663
														3	0.513889	0.361111	0.319444	0.458333	0.354167	0.319444	0.333333	0.333333	0.333333	0.333333	0.333333	0.333333	0.486111	0.357639	0.319444		0.180556	0.0277781	-0.0138886	0.125	0.0208337	-0.0138886	0.0555556	0.00694444	0	0.152778	0.0243059	-0.0138886
														4	0.583333	0.402778	0.284722	0.493056	0.333333	0.270833	0.333333	0.333333	0.333333	0.333333	0.333333	0.333333	0.538194	0.368056	0.277778		0.25	0.0694448	-0.0486108	0.159723	3.33333e-07	-0.0624997	0.0902778	0.0694444	0.0138889	0.204861	0.0347226	-0.0555552
														5	0.361111	0.375	0.347222	0.493056	0.333333	0.361111	0.333333	0.333333	0.333333	0.333333	0.333333	0.333333	0.427083	0.354167	0.354167		0.0277781	0.041667	0.0138892	0.159723	3.33333e-07	0.0277781	-0.131944	0.0416667	-0.0138889	0.0937503	0.0208337	0.0208337
														6	0.430556	0.333333	0.284722	0.4375	0.263889	0.298611	0.333333	0.333333	0.333333	0.333333	0.333333	0.333333	0.434028	0.298611	0.291667		0.0972226	3.33333e-07	-0.0486108	0.104167	-0.0694441	-0.0347219	-0.00694444	0.0694444	-0.0138889	0.100695	-0.0347219	-0.0416663
														7	0.381944	0.263889	0.319444	0.388889	0.270833	0.3125	0.333333	0.333333	0.333333	0.333333	0.333333	0.333333	0.385417	0.267361	0.315972		0.0486114	-0.0694441	-0.0138886	0.0555559	-0.0624997	-0.020833	-0.00694444	-0.00694444	0.00694444	0.0520837	-0.0659719	-0.0173608
														8	0.4375	0.263889	0.270833	0.472222	0.3125	0.243056	0.333333	0.333333	0.333333	0.333333	0.333333	0.333333	0.454861	0.288194	0.256944		0.104167	-0.0694441	-0.0624997	0.138889	-0.020833	-0.0902774	-0.0347222	-0.0486111	0.0277778	0.121528	-0.0451386	-0.0763886
														9	0.548611	0.215278	0.1875	0.534722	0.277778	0.166667	0.333333	0.333333	0.333333	0.333333	0.333333	0.333333	0.541667	0.246528	0.177083		0.215278	-0.118055	-0.145833	0.201389	-0.0555552	-0.166666	0.0138889	-0.0625	0.0208333	0.208334	-0.0868052	-0.15625
														10	0.395833	0.25	0.1875	0.395833	0.305556	0.263889	0.333333	0.333333	0.333333	0.333333	0.333333	0.333333	0.395833	0.277778	0.225694		0.0625003	-0.083333	-0.145833	0.0625003	-0.0277774	-0.0694441	0	-0.0555556	-0.0763889	0.0625003	-0.0555552	-0.107639
														11	0.479167	0.340278	0.284722	0.4375	0.340278	0.277778	0.333333	0.333333	0.333333	0.333333	0.333333	0.333333	0.458333	0.340278	0.28125		0.145834	0.00694478	-0.0486108	0.104167	0.00694478	-0.0555552	0.0416667	0	0.00694444	0.125	0.00694478	-0.052083
														12	0.402778	0.291667	0.270833	0.395833	0.326389	0.354167	0.333333	0.333333	0.333333	0.333333	0.333333	0.333333	0.399306	0.309028	0.3125		0.0694448	-0.0416663	-0.0624997	0.0625003	-0.00694411	0.0208337	0.00694444	-0.0347222	-0.0833333	0.0659726	-0.0243052	-0.020833
														13	0.423611	0.270833	0.326389	0.375	0.298611	0.305556	0.333333	0.333333	0.333333	0.333333	0.333333	0.333333	0.399306	0.284722	0.315972		0.0902781	-0.0624997	-0.00694411	0.041667	-0.0347219	-0.0277774	0.0486111	-0.0277778	0.0208333	0.0659726	-0.0486108	-0.0173608
														14	0.486111	0.243056	0.25	0.402778	0.243056	0.333333	0.333333	0.333333	0.333333	0.333333	0.333333	0.333333	0.444444	0.243056	0.291667		0.152778	-0.0902774	-0.083333	0.0694448	-0.0902774	3.33333e-07	0.0833333	0	-0.0833333	0.111111	-0.0902774	-0.0416663
														15	0.4375	0.270833	0.298611	0.402778	0.333333	0.3125	0.333333	0.333333	0.333333	0.333333	0.333333	0.333333	0.420139	0.302083	0.305556		0.104167	-0.0624997	-0.0347219	0.0694448	3.33333e-07	-0.020833	0.0347222	-0.0625	-0.0138889	0.0868059	-0.0312497	-0.0277774
														16	0.458333	0.25	0.284722	0.465278	0.201389	0.263889	0.333333	0.333333	0.333333	0.333333	0.333333	0.333333	0.461806	0.225694	0.274306		0.125	-0.083333	-0.0486108	0.131945	-0.131944	-0.0694441	-0.00694444	0.0486111	0.0208333	0.128473	-0.107639	-0.0590274
														17	0.416667	0.243056	0.333333	0.354167	0.291667	0.291667	0.333333	0.333333	0.333333	0.333333	0.333333	0.333333	0.385417	0.267361	0.3125		0.0833337	-0.0902774	3.33333e-07	0.0208337	-0.0416663	-0.0416663	0.0625	-0.0486111	0.0416667	0.0520837	-0.0659719	-0.020833
														18	0.458333	0.277778	0.347222	0.416667	0.25	0.340278	0.333333	0.333333	0.333333	0.333333	0.333333	0.333333	0.4375	0.263889	0.34375		0.125	-0.0555552	0.0138892	0.0833337	-0.083333	0.00694478	0.0416667	0.0277778	0.00694444	0.104167	-0.0694441	0.010417
														19	0.513889	0.305556	0.340278	0.5	0.298611	0.298611	0.333333	0.333333	0.333333	0.333333	0.333333	0.333333	0.506944	0.302083	0.319444		0.180556	-0.0277774	0.00694478	0.166667	-0.0347219	-0.0347219	0.0138889	0.00694444	0.0416667	0.173611	-0.0312497	-0.0138886
														20	0.4375	0.201389	0.1875	0.458333	0.25	0.263889	0.333333	0.333333	0.333333	0.333333	0.333333	0.333333	0.447917	0.225694	0.225694		0.104167	-0.131944	-0.145833	0.125	-0.083333	-0.0694441	-0.0208333	-0.0486111	-0.0763889	0.114584	-0.107639	-0.107639
														21	0.375	0.256944	0.236111	0.402778	0.319444	0.229167	0.333333	0.333333	0.333333	0.333333	0.333333	0.333333	0.388889	0.288194	0.232639		0.041667	-0.0763886	-0.0972219	0.0694448	-0.0138886	-0.104166	-0.0277778	-0.0625	0.00694444	0.0555559	-0.0451386	-0.100694
														22	0.326389	0.368056	0.284722	0.375	0.298611	0.291667	0.333333	0.333333	0.333333	0.333333	0.333333	0.333333	0.350694	0.333333	0.288194		-0.00694411	0.0347226	-0.0486108	0.041667	-0.0347219	-0.0416663	-0.0486111	0.0694444	-0.00694444	0.0173614	3.33333e-07	-0.0451386
														23	0.402778	0.291667	0.291667	0.340278	0.305556	0.256944	0.333333	0.333333	0.333333	0.333333	0.333333	0.333333	0.371528	0.298611	0.274306		0.0694448	-0.0416663	-0.0416663	0.00694478	-0.0277774	-0.0763886	0.0625	-0.0138889	0.0347222	0.0381948	-0.0347219	-0.0590274
														24	0.444444	0.361111	0.388889	0.388889	0.3125	0.361111	0.333333	0.333333	0.333333	0.333333	0.333333	0.333333	0.416667	0.336806	0.375		0.111111	0.0277781	0.0555559	0.0555559	-0.020833	0.0277781	0.0555556	0.0486111	0.0277778	0.0833337	0.00347256	0.041667
														mean	0.445602	0.29022	0.285301	0.431424	0.291956	0.29022						mean	0.438513	0.291088	0.28776	mean	0.112269	-0.0431131	-0.0480321	0.0980906	-0.041377	-0.0431131	0.0141782	-0.00173611	-0.00491898	0.10518	-0.042245	-0.0455726
														SE	0.0127383	0.0117487	0.0106973	0.0108465	0.00863241	0.00926221						SE	0.0107357	0.0092167	0.00920638	Stdev	0.0624049	0.0575568	0.0524061	0.053137	0.04229	0.0453754	0.0486964	0.0452491	0.0383918	0.0525939	0.0451524	0.0451019
														Ttest	7.8313e-09	0.001273	0.00016592	4.91866e-09	7.79557e-05	0.000110056						Ttest	1.12364e-09	0.00013143	5.27872e-05
														TtestPC_CP	0.167196	0.852554	0.536392													Cohen's d'	1.79904	-0.749053	-0.916536	1.84599	-0.978411	-0.950143	0.291156	-0.0383679	-0.128126	1.99985	-0.935609	-1.01044
