# Supplementary material for: Current and future goals are represented in opposite patterns in object-selective cortex
Source: eLife journal article supplement (doi:10.7554/elife.38677), 2018-11-05
Supplement: supp [file Figure3_RDM.xlsx]

## Sheet: RDM&Histogram
																																											RDM index
	DELAY																																						Differemce							1	2	3	4
			Current				Current				Current				Prospective				Prospective				Prospective						Figure 3C			Delay		Search1		Search2			Delay	Search1	Search2					Current
			Cow1	Cow2	Cow3	Cow4	Dres1	Dres2	Dres3	Dres4	Ska1	Ska2	Ska3	Ska4	Cow1	Cow2	Cow3	Cow4	Dres1	Dres2	Dres3	Dres4	Ska1	Ska2	Ska3	Ska4			within	Same Category Different Relevance		Same	Different	Same	Different	Same	Different						1			Cow1	Cow2	Cow3	Cow4
	Current	Cow1	0	0.115453	0.0301954	0.122558	0.91119	0.825933	0.893428	0.715808	0.367673	0.499112	0.55595	0.431616	0.0905861	0.0230906	0.388988	0.0337478	0.89698	0.921847	0.83659	0.971581	0.410302	0.701599	0.793961	0.417407			between	Different Categoy Different Relevance	1	0.576171	0.675637	0.98048	0.87872	0.789111	0.754392		-0.0994657	0.10176	0.0347189		2	Current	Cow1	0	1	2	3
		Cow2	0.115453	0	0.119005	0.243339	1	0.833037	0.918295	0.936057	0.779751	0.584369	0.815275	0.293073	0.0870337	0.101243	0.403197	0.143872	0.857904	0.957371	0.854352	0.996448	0.840142	0.790409	0.82238	0.328597					2	0.43888	0.484383	0.773158	0.796666	0.690472	0.682062		-0.0455031	-0.0235086	0.00841003		3		Cow2	1	0	24	25
		Cow3	0.0301954	0.119005	0	0.0692718	0.648313	0.349911	0.218472	0.150977	0.0515098	0.111901	0.374778	0.129663	0.0373002	0.026643	0.147425	0.044405	0.342806	0.296625	0.22913	0.953819	0.0834813	0.46714	0.307282	0.250444					3	0.404024	0.445884	0.695281	0.684455	0.617778	0.614759		-0.0418605	0.0108263	0.00301837		4		Cow3	2	24	0	46
		Cow4	0.122558	0.243339	0.0692718	0	0.861456	0.609236	0.776199	0.332149	0.435169	0.154529	0.30373	0.182948	0.0941385	0.0550622	0.442274	0.186501	0.548845	0.811723	0.804618	0.978686	0.602131	0.424512	0.676732	0.477798					4	0.498908	0.579557	0.742098	0.766943	0.579421	0.555218		-0.0806487	-0.0248452	0.0242037		5		Cow4	3	25	46	0
	Current	Dres1	0.91119	1	0.648313	0.861456	0	0.523979	0.452931	0.271758	0.591474	0.502664	0.73357	0.428064	0.968028	0.982238	0.992895	0.943162	0.932504	0.616341	0.559503	0.666075	0.904085	0.9254	0.98579	0.626998					5	0.574925	0.604182	0.727595	0.722456	0.678229	0.676548		-0.0292577	0.00513952	0.00168098		6	Current	Dres1	4	26	47	67
		Dres2	0.825933	0.833037	0.349911	0.609236	0.523979	0	0.257549	0.0728242	0.211368	0.104796	0.133215	0.079929	0.641208	0.264654	0.818828	0.705151	0.0976909	0.278863	0.108348	0.595027	0.360568	0.474245	0.64476	0.456483					6	0.422592	0.438908	0.732786	0.709457	0.554739	0.547281		-0.0163158	0.0233289	0.00745798		7		Dres2	5	27	48	68
		Dres3	0.893428	0.918295	0.218472	0.776199	0.452931	0.257549	0	0.158082	0.20071	0.520426	0.655417	0.161634	0.761989	0.829485	0.939609	0.769094	0.175844	0.687389	0.513321	0.612789	0.49556	0.630551	0.573712	0.48135					7	0.580125	0.63096	0.72136	0.692136	0.679552	0.654954		-0.0508353	0.0292237	0.024598		8		Dres3	6	28	49	69
		Dres4	0.715808	0.936057	0.150977	0.332149	0.271758	0.0728242	0.158082	0	0.207815	0.531083	0.634103	0.335702	0.712256	0.74778	0.928952	0.314387	0.179396	0.605684	0.12611	0.730018	0.364121	0.65897	0.765542	0.285968					8	0.643616	0.65475	0.845591	0.832881	0.745538	0.735597		-0.0111343	0.0127099	0.00994192		9		Dres4	7	29	50	70
	Current	Ska1	0.367673	0.779751	0.0515098	0.435169	0.591474	0.211368	0.20071	0.207815	0	0.261101	0.197158	0.062167	0.545293	0.353464	0.744227	0.541741	0.463588	0.39254	0.325044	0.872114	0.563055	0.300178	0.708703	0.0657194					9	0.435208	0.517417	0.689165	0.65693	0.580258	0.526054		-0.082209	0.0322352	0.0542042		10	Current	Ska1	8	30	51	71
		Ska2	0.499112	0.584369	0.111901	0.154529	0.502664	0.104796	0.520426	0.531083	0.261101	0	0.232682	0.0763766	0.381883	0.470693	0.740675	0.239787	0.577265	0.527531	0.236234	0.865009	0.37833	0.662522	0.637655	0.0586146					10	0.655871	0.675993	0.935479	0.914233	0.756228	0.728127		-0.0201219	0.0212456	0.0281013		11		Ska2	9	31	52	72
		Ska3	0.55595	0.815275	0.374778	0.30373	0.73357	0.133215	0.655417	0.634103	0.197158	0.232682	0	0.165187	0.598579	0.399645	0.801066	0.680284	0.726465	0.772647	0.420959	0.900533	0.438721	0.40675	0.907638	0.172291					11	0.534996	0.651347	0.755173	0.740027	0.588841	0.557946		-0.116351	0.0151459	0.0308955		12		Ska3	10	32	53	73
		Ska4	0.431616	0.293073	0.129663	0.182948	0.428064	0.079929	0.161634	0.335702	0.062167	0.0763766	0.165187	0	0.268206	0.190053	0.506217	0.460036	0.282416	0.538188	0.136767	0.868561	0.275311	0.28952	0.339254	0.225577					12	0.643562	0.657497	0.834607	0.830281	0.781908	0.76763		-0.0139348	0.00432568	0.0142786		13		Ska4	11	33	54	74
	Prospective	Cow1	0.0905861	0.0870337	0.0373002	0.0941385	0.968028	0.641208	0.761989	0.712256	0.545293	0.381883	0.598579	0.268206	0	0.0408526	0.21492	0.253996	0.690941	0.850799	0.57016	0.975133	0.619893	0.786856	0.722913	0.587922					13	0.633462	0.638763	0.771957	0.739239	0.629538	0.619645		-0.0053005	0.032718	0.00989324		14	Prospective	Cow1	12	13	14	15
		Cow2	0.0230906	0.101243	0.026643	0.0550622	0.982238	0.264654	0.829485	0.74778	0.353464	0.470693	0.399645	0.190053	0.0408526	0	0.14032	0.0479574	0.623446	0.580817	0.445826	0.946714	0.346359	0.492007	0.534636	0.204263					14	0.581372	0.615089	0.673244	0.649024	0.603856	0.585774		-0.0337163	0.0242207	0.0180822		15		Cow2	34	35	36	37
		Cow3	0.388988	0.403197	0.147425	0.442274	0.992895	0.818828	0.939609	0.928952	0.744227	0.740675	0.801066	0.506217	0.21492	0.14032	0	0.449378	0.950266	0.914742	0.882771	0.989343	0.886323	0.847247	0.843694	0.875666					15	0.642872	0.675636	0.842421	0.83395	0.712457	0.711961		-0.0327642	0.00847135	0.000495141		16		Cow3	55	56	57	58
		Cow4	0.0337478	0.143872	0.044405	0.186501	0.943162	0.705151	0.769094	0.314387	0.541741	0.239787	0.680284	0.460036	0.253996	0.0479574	0.449378	0	0.413854	0.683837	0.808171	0.960924	0.321492	0.669627	0.488455	0.310835					16	0.573167	0.634699	0.800563	0.770143	0.667549	0.646252		-0.0615319	0.0304195	0.0212974		17		Cow4	75	76	77	78
	Prospective	Dres1	0.89698	0.857904	0.342806	0.548845	0.932504	0.0976909	0.175844	0.179396	0.463588	0.577265	0.726465	0.282416	0.690941	0.623446	0.950266	0.413854	0	0.385435	0.357016	0.651865	0.193606	0.168739	0.484902	0.396092					17	0.507209	0.520323	0.605469	0.59199	0.552603	0.530182		-0.0131132	0.0134789	0.0224206		18	Prospective	Dres1	94	95	96	97
		Dres2	0.921847	0.957371	0.296625	0.811723	0.616341	0.278863	0.687389	0.605684	0.39254	0.527531	0.772647	0.538188	0.850799	0.580817	0.914742	0.683837	0.385435	0	0.737123	0.964476	0.758437	0.797513	0.889876	0.698046					18	0.627808	0.653718	0.678937	0.684775	0.672301	0.698319		-0.0259106	-0.00583781	-0.0260183		19		Dres2	112	113	114	115
		Dres3	0.83659	0.854352	0.22913	0.804618	0.559503	0.108348	0.513321	0.12611	0.325044	0.236234	0.420959	0.136767	0.57016	0.445826	0.882771	0.808171	0.357016	0.737123	0	0.694494	0.246892	0.371226	0.751332	0.222025					19	0.672566	0.712918	0.772021	0.765061	0.771332	0.761831		-0.0403528	0.00695985	0.00950034		20		Dres3	129	130	131	132
		Dres4	0.971581	0.996448	0.953819	0.978686	0.666075	0.595027	0.612789	0.730018	0.872114	0.865009	0.900533	0.868561	0.975133	0.946714	0.989343	0.960924	0.651865	0.964476	0.694494	0	0.783304	0.754885	0.879218	0.719361					20	0.602987	0.638449	0.757964	0.731128	0.672946	0.621418		-0.0354623	0.026836	0.0515276		21		Dres4	145	146	147	148
	Prospective	Ska1	0.410302	0.840142	0.0834813	0.602131	0.904085	0.360568	0.49556	0.364121	0.563055	0.37833	0.438721	0.275311	0.619893	0.346359	0.886323	0.321492	0.193606	0.758437	0.246892	0.783304	0	0.509769	0.673179	0.552398					21	0.740701	0.741536	0.881541	0.87274	0.850607	0.828819		-0.000835111	0.00880096	0.0217879		22	Prospective	Ska1	160	161	162	163
		Ska2	0.701599	0.790409	0.46714	0.424512	0.9254	0.474245	0.630551	0.65897	0.300178	0.662522	0.40675	0.28952	0.786856	0.492007	0.847247	0.669627	0.168739	0.797513	0.371226	0.754885	0.509769	0	0.516874	0.31794					22	0.60432	0.591641	0.685227	0.672353	0.647578	0.638992		0.0126791	0.0128744	0.00858574		23		Ska2	174	175	176	177
		Ska3	0.793961	0.82238	0.307282	0.676732	0.98579	0.64476	0.573712	0.765542	0.708703	0.637655	0.907638	0.339254	0.722913	0.534636	0.843694	0.488455	0.484902	0.889876	0.751332	0.879218	0.673179	0.516874	0	0.566607					23	0.64671	0.642067	0.823178	0.812664	0.652384	0.635401		0.00464253	0.0105146	0.0169825		24		Ska3	187	188	189	190
		Ska4	0.417407	0.328597	0.250444	0.477798	0.626998	0.456483	0.48135	0.285968	0.0657194	0.0586146	0.172291	0.225577	0.587922	0.204263	0.875666	0.310835	0.396092	0.698046	0.222025	0.719361	0.552398	0.31794	0.566607	0					24	0.670236	0.709968	0.795531	0.804182	0.716546	0.716833		-0.0397323	-0.00865181	-0.000286567				Ska4	199	200	201	202
																															mean	0.579679	0.616305	0.771701	0.756352	0.674657	0.658166	mean	-0.0366265	0.0153497	0.0164907
	Search 1																														ttest	1.28305e-05		0.00483911		8.52977e-05		stdev	0.032481	0.0241189	0.0169827
			Current				Current				Current				Prospective				Prospective				Prospective
			Cow1	Cow2	Cow3	Cow4	Dres1	Dres2	Dres3	Dres4	Ska1	Ska2	Ska3	Ska4	Cow1	Cow2	Cow3	Cow4	Dres1	Dres2	Dres3	Dres4	Ska1	Ska2	Ska3	Ska4												Cohen's d	-1.12763	0.636416	0.971028
	Current	Cow1	0	0.182948	0.133215	0.158082	0.673179	0.388988	0.452931	0.435169	0.261101	0.22913	0.218472	0.21492	0.840142	0.797513	0.904085	0.975133	0.879218	0.825933	0.875666	0.65897	0.953819	0.513321	0.57016	0.811723
		Cow2	0.182948	0	0.115453	0.0941385	0.424512	0.243339	0.282416	0.271758	0.190053	0.168739	0.197158	0.161634	0.914742	0.98579	0.939609	0.960924	0.818828	0.889876	0.9254	0.865009	0.950266	0.833037	0.740675	0.907638
		Cow3	0.133215	0.115453	0	0.0408526	0.250444	0.154529	0.193606	0.186501	0.0550622	0.0763766	0.147425	0.0870337	0.666075	0.584369	0.577265	0.46714	0.49556	0.598579	0.708703	0.264654	0.648313	0.449378	0.314387	0.470693
		Cow4	0.158082	0.0941385	0.0408526	0	0.527531	0.20071	0.207815	0.239787	0.12611	0.136767	0.165187	0.143872	0.687389	0.850799	0.89698	0.765542	0.776199	0.786856	0.900533	0.595027	0.868561	0.591474	0.854352	0.634103
	Current	Dres1	0.673179	0.424512	0.250444	0.527531	0	0.0337478	0.0834813	0.0657194	0.150977	0.14032	0.175844	0.172291	0.861456	0.779751	0.82238	0.957371	0.989343	0.928952	1	0.943162	0.996448	0.829485	0.992895	0.982238
		Dres2	0.388988	0.243339	0.154529	0.20071	0.0337478	0	0.0230906	0.026643	0.0515098	0.0728242	0.044405	0.0905861	0.548845	0.335702	0.484902	0.520426	0.847247	0.843694	0.886323	0.534636	0.893428	0.680284	0.705151	0.580817
		Dres3	0.452931	0.282416	0.193606	0.207815	0.0834813	0.0230906	0	0.0301954	0.0976909	0.111901	0.108348	0.129663	0.761989	0.321492	0.552398	0.730018	0.971581	0.978686	0.946714	0.74778	0.936057	0.783304	0.857904	0.616341
		Dres4	0.435169	0.271758	0.186501	0.239787	0.0657194	0.026643	0.0301954	0	0.062167	0.079929	0.122558	0.104796	0.801066	0.573712	0.690941	0.719361	0.793961	0.815275	0.968028	0.872114	0.964476	0.531083	0.83659	0.804618
	Current	Ska1	0.261101	0.190053	0.0550622	0.12611	0.150977	0.0515098	0.0976909	0.062167	0	0.0373002	0.0692718	0.0479574	0.612789	0.403197	0.477798	0.602131	0.456483	0.623446	0.744227	0.381883	0.932504	0.566607	0.55595	0.605684
		Ska2	0.22913	0.168739	0.0763766	0.136767	0.14032	0.0728242	0.111901	0.079929	0.0373002	0	0.119005	0.0586146	0.683837	0.637655	0.669627	0.698046	0.751332	0.715808	0.921847	0.488455	0.772647	0.712256	0.676732	0.474245
		Ska3	0.218472	0.197158	0.147425	0.165187	0.175844	0.044405	0.108348	0.122558	0.0692718	0.119005	0	0.101243	0.563055	0.523979	0.619893	0.726465	0.790409	0.651865	0.882771	0.506217	0.73357	0.626998	0.808171	0.630551
		Ska4	0.21492	0.161634	0.0870337	0.143872	0.172291	0.0905861	0.129663	0.104796	0.0479574	0.0586146	0.101243	0	0.722913	0.541741	0.587922	0.662522	0.694494	0.754885	0.918295	0.701599	0.91119	0.64476	0.559503	0.737123
	Prospective	Cow1	0.840142	0.914742	0.666075	0.687389	0.861456	0.548845	0.761989	0.801066	0.612789	0.683837	0.563055	0.722913	0	0.339254	0.492007	0.545293	0.442274	0.399645	0.39254	0.371226	0.417407	0.428064	0.460036	0.296625
		Cow2	0.797513	0.98579	0.584369	0.850799	0.779751	0.335702	0.321492	0.573712	0.403197	0.637655	0.523979	0.541741	0.339254	0	0.211368	0.307282	0.420959	0.349911	0.179396	0.222025	0.300178	0.253996	0.236234	0.204263
		Cow3	0.904085	0.939609	0.577265	0.89698	0.82238	0.484902	0.552398	0.690941	0.477798	0.669627	0.619893	0.587922	0.492007	0.211368	0	0.655417	0.769094	0.609236	0.509769	0.310835	0.463588	0.641208	0.410302	0.364121
		Cow4	0.975133	0.960924	0.46714	0.765542	0.957371	0.520426	0.730018	0.719361	0.602131	0.698046	0.726465	0.662522	0.545293	0.307282	0.655417	0	0.357016	0.758437	0.502664	0.367673	0.396092	0.385435	0.413854	0.360568
	Prospective	Dres1	0.879218	0.818828	0.49556	0.776199	0.989343	0.847247	0.971581	0.793961	0.456483	0.751332	0.790409	0.694494	0.442274	0.420959	0.769094	0.357016	0	0.40675	0.246892	0.293073	0.48135	0.268206	0.353464	0.499112
		Dres2	0.825933	0.889876	0.598579	0.786856	0.928952	0.843694	0.978686	0.815275	0.623446	0.715808	0.651865	0.754885	0.399645	0.349911	0.609236	0.758437	0.40675	0	0.37833	0.431616	0.438721	0.445826	0.538188	0.285968
		Dres3	0.875666	0.9254	0.708703	0.900533	1	0.886323	0.946714	0.968028	0.744227	0.921847	0.882771	0.918295	0.39254	0.179396	0.509769	0.502664	0.246892	0.37833	0	0.278863	0.232682	0.325044	0.30373	0.225577
		Dres4	0.65897	0.865009	0.264654	0.595027	0.943162	0.534636	0.74778	0.872114	0.381883	0.488455	0.506217	0.701599	0.371226	0.222025	0.310835	0.367673	0.293073	0.431616	0.278863	0	0.342806	0.346359	0.275311	0.374778
	Prospective	Ska1	0.953819	0.950266	0.648313	0.868561	0.996448	0.893428	0.936057	0.964476	0.932504	0.772647	0.73357	0.91119	0.417407	0.300178	0.463588	0.396092	0.48135	0.438721	0.232682	0.342806	0	0.516874	0.31794	0.328597
		Ska2	0.513321	0.833037	0.449378	0.591474	0.829485	0.680284	0.783304	0.531083	0.566607	0.712256	0.626998	0.64476	0.428064	0.253996	0.641208	0.385435	0.268206	0.445826	0.325044	0.346359	0.516874	0	0.28952	0.332149
		Ska3	0.57016	0.740675	0.314387	0.854352	0.992895	0.705151	0.857904	0.83659	0.55595	0.676732	0.808171	0.559503	0.460036	0.236234	0.410302	0.413854	0.353464	0.538188	0.30373	0.275311	0.31794	0.28952	0	0.257549
		Ska4	0.811723	0.907638	0.470693	0.634103	0.982238	0.580817	0.616341	0.804618	0.605684	0.474245	0.630551	0.737123	0.296625	0.204263	0.364121	0.360568	0.499112	0.285968	0.225577	0.374778	0.328597	0.332149	0.257549	0
	Search 2
			Current				Current				Current				Prospective				Prospective				Prospective
			Cow1	Cow2	Cow3	Cow4	Dres1	Dres2	Dres3	Dres4	Ska1	Ska2	Ska3	Ska4	Cow1	Cow2	Cow3	Cow4	Dres1	Dres2	Dres3	Dres4	Ska1	Ska2	Ska3	Ska4
	Current	Cow1	0	0.641208	0.346359	0.662522	0.563055	0.30373	0.719361	0.737123	0.438721	0.566607	0.349911	0.48135	0.932504	0.634103	0.907638	0.342806	0.452931	0.712256	0.296625	0.360568	0.435169	0.428064	0.381883	0.420959
		Cow2	0.641208	0	0.40675	0.371226	0.726465	0.527531	0.605684	0.960924	0.499112	0.545293	0.651865	0.89698	0.410302	0.854352	0.98579	0.939609	0.595027	0.388988	0.325044	0.39254	0.637655	0.367673	0.701599	0.655417
		Cow3	0.346359	0.40675	0	0.460036	0.875666	0.477798	0.31794	0.484902	0.683837	0.431616	0.449378	0.314387	0.591474	0.730018	0.722913	0.264654	0.300178	0.307282	0.253996	0.28952	0.278863	0.285968	0.257549	0.332149
		Cow4	0.662522	0.371226	0.460036	0	0.580817	0.310835	0.793961	0.64476	0.538188	0.694494	0.413854	0.761989	0.268206	0.456483	0.584369	0.573712	0.463588	0.474245	0.261101	0.271758	0.293073	0.275311	0.321492	0.587922
	Current	Dres1	0.563055	0.726465	0.875666	0.580817	0	0.502664	0.630551	0.513321	0.921847	0.73357	0.57016	0.865009	0.619893	0.399645	0.936057	0.374778	0.971581	0.996448	0.769094	0.833037	0.690941	0.808171	0.850799	0.804618
		Dres2	0.30373	0.527531	0.477798	0.310835	0.502664	0	0.666075	0.552398	0.598579	0.548845	0.523979	0.445826	0.357016	0.46714	0.676732	0.531083	0.673179	0.9254	0.559503	0.403197	0.708703	0.396092	0.541741	0.715808
		Dres3	0.719361	0.605684	0.31794	0.793961	0.630551	0.666075	0	0.797513	0.470693	0.534636	0.609236	0.687389	0.509769	0.65897	0.779751	0.339254	0.889876	0.964476	0.82238	0.758437	0.612789	0.783304	0.765542	0.385435
		Dres4	0.737123	0.960924	0.484902	0.64476	0.513321	0.552398	0.797513	0	0.328597	0.55595	0.776199	0.417407	0.616341	0.754885	0.953819	0.506217	1	0.982238	0.698046	0.943162	0.520426	0.893428	0.840142	0.946714
	Current	Ska1	0.438721	0.499112	0.683837	0.538188	0.921847	0.598579	0.470693	0.328597	0	0.49556	0.847247	0.818828	0.602131	0.868561	0.989343	0.843694	0.904085	0.928952	0.626998	0.705151	0.992895	0.577265	0.751332	0.740675
		Ska2	0.566607	0.545293	0.431616	0.694494	0.73357	0.548845	0.534636	0.55595	0.49556	0	0.744227	0.442274	0.825933	0.914742	0.950266	0.772647	0.968028	0.975133	0.879218	0.900533	0.829485	0.886323	0.872114	0.978686
		Ska3	0.349911	0.651865	0.449378	0.413854	0.57016	0.523979	0.609236	0.776199	0.847247	0.744227	0	0.492007	0.680284	0.790409	0.882771	0.282416	0.811723	0.801066	0.353464	0.488455	0.37833	0.424512	0.83659	0.516874
		Ska4	0.48135	0.89698	0.314387	0.761989	0.865009	0.445826	0.687389	0.417407	0.818828	0.442274	0.492007	0	0.857904	0.957371	0.815275	0.623446	0.786856	0.918295	0.364121	0.648313	0.91119	0.74778	0.669627	0.861456
	Prospective	Cow1	0.932504	0.410302	0.591474	0.268206	0.619893	0.357016	0.509769	0.616341	0.602131	0.825933	0.680284	0.857904	0	0.0515098	0.190053	0.0763766	0.246892	0.243339	0.172291	0.222025	0.186501	0.12611	0.168739	0.20071
		Cow2	0.634103	0.854352	0.730018	0.456483	0.399645	0.46714	0.65897	0.754885	0.868561	0.914742	0.790409	0.957371	0.0515098	0	0.197158	0.0301954	0.239787	0.225577	0.122558	0.204263	0.108348	0.0834813	0.133215	0.101243
		Cow3	0.907638	0.98579	0.722913	0.584369	0.936057	0.676732	0.779751	0.953819	0.989343	0.950266	0.882771	0.815275	0.190053	0.197158	0	0.129663	0.250444	0.335702	0.22913	0.211368	0.232682	0.218472	0.21492	0.207815
		Cow4	0.342806	0.939609	0.264654	0.573712	0.374778	0.531083	0.339254	0.506217	0.843694	0.772647	0.282416	0.623446	0.0763766	0.0301954	0.129663	0	0.193606	0.236234	0.165187	0.158082	0.0976909	0.119005	0.154529	0.115453
	Prospective	Dres1	0.452931	0.595027	0.300178	0.463588	0.971581	0.673179	0.889876	1	0.904085	0.968028	0.811723	0.786856	0.246892	0.239787	0.250444	0.193606	0	0.0586146	0.026643	0.044405	0.143872	0.0941385	0.111901	0.161634
		Dres2	0.712256	0.388988	0.307282	0.474245	0.996448	0.9254	0.964476	0.982238	0.928952	0.975133	0.801066	0.918295	0.243339	0.225577	0.335702	0.236234	0.0586146	0	0.0373002	0.0337478	0.182948	0.147425	0.179396	0.136767
		Dres3	0.296625	0.325044	0.253996	0.261101	0.769094	0.559503	0.82238	0.698046	0.626998	0.879218	0.353464	0.364121	0.172291	0.122558	0.22913	0.165187	0.026643	0.0373002	0	0.0230906	0.0905861	0.0550622	0.0692718	0.0408526
		Dres4	0.360568	0.39254	0.28952	0.271758	0.833037	0.403197	0.758437	0.943162	0.705151	0.900533	0.488455	0.648313	0.222025	0.204263	0.211368	0.158082	0.044405	0.0337478	0.0230906	0	0.0657194	0.0870337	0.0728242	0.0479574
	Prospective	Ska1	0.435169	0.637655	0.278863	0.293073	0.690941	0.708703	0.612789	0.520426	0.992895	0.829485	0.37833	0.91119	0.186501	0.108348	0.232682	0.0976909	0.143872	0.182948	0.0905861	0.0657194	0	0.104796	0.175844	0.150977
		Ska2	0.428064	0.367673	0.285968	0.275311	0.808171	0.396092	0.783304	0.893428	0.577265	0.886323	0.424512	0.74778	0.12611	0.0834813	0.218472	0.119005	0.0941385	0.147425	0.0550622	0.0870337	0.104796	0	0.062167	0.14032
		Ska3	0.381883	0.701599	0.257549	0.321492	0.850799	0.541741	0.765542	0.840142	0.751332	0.872114	0.83659	0.669627	0.168739	0.133215	0.21492	0.154529	0.111901	0.179396	0.0692718	0.0728242	0.175844	0.062167	0	0.079929
		Ska4	0.420959	0.655417	0.332149	0.587922	0.804618	0.715808	0.385435	0.946714	0.740675	0.978686	0.516874	0.861456	0.20071	0.101243	0.207815	0.115453	0.161634	0.136767	0.0408526	0.0479574	0.150977	0.14032	0.079929	0
									Differemce
			Delay		Search1		Search2			Delay	Search1	Search2
			Same	Different	Same	Different	Same	Different
		1	0.576171	0.675637	0.98048	0.87872	0.789111	0.754392		-0.0994657	0.10176	0.0347189
		2	0.43888	0.484383	0.773158	0.796666	0.690472	0.682062		-0.0455031	-0.0235086	0.00841002
		3	0.404024	0.445884	0.695281	0.684455	0.617778	0.614759		-0.0418605	0.0108263	0.00301837
		4	0.498908	0.579557	0.742098	0.766943	0.579421	0.555218		-0.0806487	-0.0248452	0.0242037
		5	0.574925	0.604182	0.727595	0.722456	0.678229	0.676548		-0.0292577	0.00513952	0.00168098
		6	0.422592	0.438908	0.732786	0.709457	0.554739	0.547281		-0.0163158	0.0233288	0.00745798
		7	0.580125	0.63096	0.72136	0.692136	0.679552	0.654954		-0.0508353	0.0292237	0.024598
		8	0.643616	0.65475	0.845591	0.832881	0.745538	0.735597		-0.0111343	0.0127099	0.00994192
		9	0.435208	0.517417	0.689165	0.65693	0.580258	0.526054		-0.082209	0.0322352	0.0542042
		10	0.655871	0.675993	0.935479	0.914233	0.756228	0.728127		-0.0201219	0.0212456	0.0281013
		11	0.534996	0.651347	0.755173	0.740027	0.588841	0.557946		-0.116351	0.0151459	0.0308955
		12	0.643562	0.657497	0.834607	0.830281	0.781908	0.76763		-0.0139348	0.00432567	0.0142786
		13	0.633462	0.638763	0.771957	0.739239	0.629538	0.619645		-0.0053005	0.032718	0.00989324
		14	0.581372	0.615089	0.673244	0.649024	0.603856	0.585774		-0.0337163	0.0242207	0.0180822
		15	0.642872	0.675636	0.842421	0.83395	0.712457	0.711961		-0.0327642	0.00847135	0.00049514
		16	0.573167	0.634699	0.800563	0.770143	0.667549	0.646252		-0.0615319	0.0304195	0.0212974
		17	0.507209	0.520323	0.605469	0.59199	0.552603	0.530182		-0.0131132	0.0134789	0.0224206
		18	0.627808	0.653718	0.678937	0.684775	0.672301	0.698319		-0.0259106	-0.00583781	-0.0260183
		19	0.672566	0.712918	0.772021	0.765061	0.771332	0.761831		-0.0403528	0.00695985	0.00950034
		20	0.602987	0.638449	0.757964	0.731128	0.672946	0.621418		-0.0354623	0.026836	0.0515276
		21	0.740701	0.741536	0.881541	0.87274	0.850607	0.828819		-0.000835111	0.00880096	0.0217879
		22	0.60432	0.591641	0.685227	0.672353	0.647578	0.638992		0.0126791	0.0128744	0.00858574
		23	0.64671	0.642067	0.823178	0.812664	0.652384	0.635401		0.00464253	0.0105146	0.0169825
		24	0.670236	0.709968	0.795531	0.804182	0.716546	0.716833		-0.0397323	-0.00865181	-0.000286566
		mean	0.579679	0.616305	0.771701	0.756352	0.674657	0.658166	mean	-0.0366265	0.0153497	0.0164907
		ttest	1.28305e-05		0.00483911		8.52977e-05		stdev	0.032481	0.0241189	0.0169827
									Cohen's d	-1.12763	0.636416	0.971028
[truncated: 20 more columns]
