# Supplementary material for: Current and future goals are represented in opposite patterns in object-selective cortex
Source: eLife journal article supplement (doi:10.7554/elife.38677), 2018-11-05
Supplement: supp [file FigureS1_MeanBold.xlsx]

## Sheet: MeanBOLD
	Current	111 333 555															Prospective	222 444 666
	TR1	TR2	TR3	TR4	TR5	TR6	TR1	TR2	TR3	TR4	TR5	TR6	TR7	TR8	TR9		TR1	TR2	TR3	TR4	TR5	TR6	TR1	TR2	TR3	TR4	TR5	TR6	TR7	TR8	TR9
	Cue	D1_1	D1_2	D1_3	D1_4	Search1	D2_1	D2_2	D2_3	D2_4	Search2	D3_1	D3_2	D3_3	D3_4		Cue	D1_1	D1_2	D1_3	D1_4	Search1	D2_1	D2_2	D2_3	D2_4	Search2	D3_1	D3_2	D3_3	D3_4
	-0.212268	0.199811	0.457763	0.247049	-0.0675896	-0.219249	-0.197066	0.371153	0.49827	0.0484318	-0.297614	-0.288679	-0.348254	-0.024597	-0.0344757		-0.173523	0.158327	0.37823	0.181376	-0.145872	-0.301635	-0.348254	-0.024597	-0.0344757	-0.321133	-0.375884	-0.247106	0.220878	0.467702	0.161199
	-0.128064	0.0787517	0.159337	-0.0920341	-0.323384	-0.271511	-0.160959	0.270645	0.318495	-0.0969368	-0.331503	-0.0085164	-0.103152	0.150011	0.0969071		-0.15633	0.0849926	0.15076	-0.0525786	-0.277342	-0.298172	-0.103152	0.150011	0.0969071	-0.285356	-0.321383	-0.0744181	0.309483	0.434041	0.0883585
	-0.0380148	0.238737	0.51517	0.372661	-0.0588934	-0.287226	-0.226804	0.253302	0.468322	0.0858425	-0.256993	-0.359762	-0.216413	0.18488	0.258472		-0.198022	0.145769	0.448286	0.254447	-0.0815696	-0.314941	-0.216413	0.18488	0.258472	-0.104761	-0.282668	-0.272569	0.0380121	0.374918	0.148416
	-0.181052	0.305889	0.464005	0.102244	-0.295132	-0.27653	-0.220293	0.325548	0.465925	-0.197948	-0.411072	-0.259556	-0.220426	0.0291898	0.0134491		-0.230082	0.214341	0.454014	0.148957	-0.255137	-0.238697	-0.220426	0.0291898	0.0134491	-0.310412	-0.473826	-0.23883	0.289018	0.536748	0.0594928
	-0.0730549	0.295714	0.447756	0.155698	-0.158112	-0.264228	-0.12509	0.379073	0.397237	0.0175966	-0.185612	-0.102896	-0.123091	0.20202	0.113881		-0.129777	0.228092	0.34729	0.0643892	-0.176375	-0.219866	-0.123091	0.20202	0.113881	-0.243995	-0.39966	-0.114007	0.274913	0.36608	0.0517241
	-0.226079	0.0773785	0.497123	0.272548	-0.206192	-0.345934	-0.239748	0.297491	0.533862	0.0550532	-0.498529	-0.445486	-0.139371	0.299525	0.31372		-0.287231	0.093964	0.487723	0.271368	-0.224367	-0.302169	-0.139371	0.299525	0.31372	-0.228696	-0.453769	-0.352008	0.14449	0.55801	0.275822
	-0.260776	0.14991	0.394386	-0.0045253	-0.289899	-0.235083	-0.0874266	0.536402	0.512173	-0.240398	-0.398328	-0.248784	-0.339248	0.135964	0.0952997		-0.229108	0.164694	0.379833	-0.0279406	-0.361366	-0.315387	-0.339248	0.135964	0.0952997	-0.3638	-0.346003	-0.119268	0.433945	0.440451	-0.01613
	-0.0663906	0.130623	0.172799	0.0490881	-0.107328	-0.131075	-0.121023	0.172106	0.233507	0.0212134	-0.115908	-0.114429	-0.205312	0.0017757	0.0228394		-0.0545131	0.0823582	0.1959	0.0255136	-0.132736	-0.184573	-0.205312	0.0017757	0.0228394	-0.138016	-0.190609	-0.1334	0.105628	0.237002	0.0518394
	-0.289122	0.0438868	0.371449	0.174175	-0.209311	-0.301298	-0.215757	0.254886	0.642467	0.237014	-0.361087	-0.277921	-0.24235	0.0911369	0.24551		-0.331934	0.0291278	0.35567	0.101373	-0.279237	-0.279326	-0.24235	0.0911369	0.24551	-0.257103	-0.465749	-0.214158	0.234206	0.566459	0.205064
	-0.175312	0.285463	0.498985	0.0595027	-0.353653	-0.237621	-0.145226	0.454908	0.552352	-0.0815137	-0.336926	-0.166984	-0.277736	-0.0515628	-0.179491		-0.164794	0.309419	0.481522	0.0695237	-0.306619	-0.266665	-0.277736	-0.0515628	-0.179491	-0.543534	-0.460713	-0.225044	0.322372	0.507244	0.0856713
	-0.111372	0.425641	0.629741	0.129322	-0.504611	-0.441691	-0.332521	0.262093	0.654102	0.0423818	-0.545577	-0.310888	-0.314675	0.141052	0.160874		-0.246365	0.310852	0.60579	0.156295	-0.482332	-0.499593	-0.314675	0.141052	0.160874	-0.457689	-0.585895	-0.307418	0.259282	0.739147	0.318153
	-0.0416145	0.325083	0.348939	-0.114108	-0.295135	-0.315292	-0.114347	0.368888	0.164693	-0.249773	-0.262989	0.0838186	-0.0999431	0.166933	-0.122693		0.0141844	0.348205	0.34855	-0.0826632	-0.258331	-0.345845	-0.0999431	0.166933	-0.122693	-0.332601	-0.347647	0.00879325	0.445279	0.348393	-0.0808244
	-0.150375	0.209882	0.235399	-0.059722	-0.233409	-0.212909	-0.0905121	0.363612	0.16347	-0.33603	-0.390718	0.00656031	-0.0633408	0.207769	-0.0487927		-0.151546	0.242215	0.403732	0.0312606	-0.223254	-0.173737	-0.0633408	0.207769	-0.0487927	-0.403084	-0.330733	-0.0182912	0.407002	0.431381	0.0396823
	-0.167505	0.418843	0.453453	-0.148245	-0.390277	-0.183775	0.0146897	0.793906	0.3938	-0.375312	-0.355233	-0.168591	-0.112255	0.258509	-0.15037		-0.181183	0.418104	0.415597	-0.204899	-0.404356	-0.35872	-0.112255	0.258509	-0.15037	-0.419677	-0.261887	0.00500369	0.49048	0.4647	-0.264574
	-0.130341	0.494249	0.526548	0.0945489	-0.193724	-0.175052	0.0392431	0.654444	0.128429	-0.379479	-0.376005	-0.128853	-0.19852	0.242978	-0.0771418		-0.147879	0.451678	0.455337	-0.0496746	-0.38621	-0.317836	-0.19852	0.242978	-0.0771418	-0.299902	-0.250019	0.00862627	0.43182	0.353773	-0.163621
	-0.254485	0.114937	0.530345	0.403714	-0.0465263	-0.271984	-0.161368	0.365523	0.681579	-0.0305186	-0.485337	-0.45315	-0.237063	0.12981	0.0767315		-0.314745	0.0931224	0.513486	0.343399	-0.089885	-0.32912	-0.237063	0.12981	0.0767315	-0.480927	-0.568859	-0.331649	0.0924187	0.502344	0.226133
	-0.389713	0.209155	0.561123	0.155561	-0.313335	-0.177735	-0.138251	0.558411	0.467907	-0.418659	-0.699596	-0.367174	-0.217168	0.29325	0.183137		-0.341017	0.248616	0.519035	0.000201655	-0.430679	-0.299341	-0.217168	0.29325	0.183137	-0.361483	-0.405843	-0.139744	0.379113	0.62045	0.126417
	-0.255981	0.181154	0.385894	0.0566657	-0.238427	-0.302429	-0.317083	0.26654	0.358464	-0.104231	-0.268593	-0.267313	-0.225576	0.247257	0.273452		-0.0476239	0.371618	0.602909	0.163801	-0.198356	-0.288394	-0.225576	0.247257	0.273452	-0.160577	-0.317268	-0.287069	0.267545	0.487958	0.120723
	-0.0413927	0.262905	0.458865	0.258744	-0.0195785	-0.228147	-0.121217	0.112643	0.212396	-0.059623	-0.231393	-0.150729	-0.215074	0.0782329	0.202758		-0.0909222	0.128578	0.360459	0.203901	-0.0538335	-0.281441	-0.215074	0.0782329	0.202758	0.0198037	-0.135145	-0.127343	0.11869	0.316993	0.185149
	-0.273374	0.295452	0.387309	-0.142522	-0.340952	-0.251689	-0.126752	0.552432	0.37922	-0.351405	-0.424745	-0.162734	-0.277623	0.134289	-0.0286409		-0.260872	0.38083	0.467512	-0.155793	-0.404341	-0.183775	-0.277623	0.134289	-0.0286409	-0.420833	-0.336865	0.0999561	0.564325	0.488583	-0.225777
	0.0268424	0.153523	0.196129	0.101988	0.0230739	-0.0978956	-0.087217	0.0983144	0.177019	0.00162098	-0.0775655	-0.133774	-0.147623	0.00927982	0.0975572		0.000145764	0.137833	0.217826	0.108662	-0.00376364	-0.13724	-0.147623	0.00927982	0.0975572	-0.0295584	-0.121857	-0.206538	0.0178108	0.149807	0.0388117
	-0.0421887	0.308868	0.346133	-0.0891617	-0.259083	-0.178031	-0.0679258	0.361857	0.321208	-0.141718	-0.273203	-0.156713	-0.212718	0.210309	0.0530043		-0.0802729	0.28751	0.263655	-0.165411	-0.293354	-0.230875	-0.212718	0.210309	0.0530043	-0.280308	-0.308636	-0.0933772	0.300869	0.381636	0.044056
	-0.237826	0.0128474	0.309519	0.177168	-0.0890209	-0.209935	-0.199043	0.293976	0.457977	0.00679766	-0.405974	-0.279888	-0.183829	0.0852562	0.0766221		-0.297288	-0.0716462	0.199409	0.0604437	-0.173646	-0.194917	-0.183829	0.0852562	0.0766221	-0.235474	-0.343525	-0.179597	0.27001	0.566375	0.256779
	-0.0518498	0.416828	0.346475	-0.183985	-0.350376	-0.311849	0.00269589	0.572985	-0.0585544	-0.363927	-0.304679	0.100911	-0.102253	0.208614	-0.200468		-0.00032087	0.474487	0.277487	-0.294723	-0.400152	-0.318781	-0.102253	0.208614	-0.200468	-0.317344	-0.284838	0.0468663	0.655981	0.305184	-0.259679
	Cue	D1_1	D1_2	D1_3	D1_4	Search1	D2_1	D2_2	D2_3	D2_4	Search2	D3_1	D3_2	D3_3	D3_4		Cue	D1_1	D1_2	D1_3	D1_4	Search1	D2_1	D2_2	D2_3	D2_4	Search2	D3_1	D3_2	D3_3	D3_4
mean	-0.157138	0.234814	0.403944	0.0823489	-0.221703	-0.247007	-0.143292	0.372547	0.38018	-0.121313	-0.345632	-0.19423	-0.200959	0.142995	0.0600892		-0.170876	0.222212	0.388751	0.0479678	-0.251796	-0.278377	-0.200959	0.142995	0.0600892	-0.290686	-0.34872	-0.146358	0.294732	0.443557	0.0613703
Se	0.0212137	0.0262184	0.0253907	0.0334162	0.0272617	0.0150426	0.0188858	0.0344957	0.0379884	0.03706	0.0276437	0.0302313	0.0159087	0.0202974	0.029818		0.0219274	0.0289678	0.0253824	0.0323778	0.0264945	0.0155479	0.0159087	0.0202974	0.029818	0.0281746	0.0239218	0.0258289	0.0331901	0.0262103	0.0332405
	Cue	D1_1	D1_2	D1_3	D1_4	Search1	Cue	D1_1	D1_2	D1_3	D1_4	Search1	D2_1	D2_2	D2_3
Curr vs Pros	0.357248	0.390705	0.35294	0.0268595	0.01689	0.020515	0.00673352	2.06112e-07	8.67978e-09	0.000128641	0.885939	0.0211317	5.04617e-13	7.88068e-10	0.958377
	TR1	TR2	TR3	TR4	TR5	TR6	TR1	TR2	TR3	TR4	TR5	TR6	TR7	TR8	TR9
	Cue	D1_1	D1_2	D1_3	D1_4	Search1	D2_1	D2_2	D2_3	D2_4	Search2	D3_1	D3_2	D3_3	D3_4
Current	-0.157138	0.234814	0.403944	0.0823489	-0.221703	-0.247007	-0.143292	0.372547	0.38018	-0.121313	-0.345632	-0.19423	-0.200959	0.142995	0.0600892
Propsective	-0.170876	0.222212	0.388751	0.0479678	-0.251796	-0.278377	-0.200959	0.142995	0.0600892	-0.290686	-0.34872	-0.146358	0.294732	0.443557	0.0613703
	0.0212137	0.0262184	0.0253907	0.0334162	0.0272617	0.0150426	0.0188858	0.0344957	0.0379884	0.03706	0.0276437	0.0302313	0.0159087	0.0202974	0.029818
	0.0219274	0.0289678	0.0253824	0.0323778	0.0264945	0.0155479	0.0159087	0.0202974	0.029818	0.0281746	0.0239218	0.0258289	0.0331901	0.0262103	0.0332405
													Current			Pros				Difference Current- Prospective
												meanTR234	Delay	Search1	Search2	Delay	Search1	Search2		Delay	Search1	Search2
												1	0.212408	0.305951	-0.135775	0.137911	-0.126735	0.28326		0.0744965	0.432687	-0.419035
												2	-0.0853605	0.164068	0.0479219	-0.0597203	-0.0128125	0.277294		-0.0256402	0.17688	-0.229372
												3	0.276313	0.269156	0.0756461	0.207055	0.112864	0.187115		0.0692581	0.156292	-0.111469
												4	0.0903721	0.197842	-0.0592623	0.115945	-0.0892576	0.295086		-0.0255726	0.287099	-0.354348
												5	0.148448	0.264635	0.06427	0.0784349	0.0239688	0.230905		0.0700126	0.240667	-0.166635
												6	0.187826	0.295469	0.157958	0.178242	0.128183	0.326107		0.00958477	0.167286	-0.16815
												7	0.0333205	0.269392	-0.0359947	-0.00315771	-0.0441788	0.286089		0.0364783	0.313571	-0.322083
												8	0.0381862	0.142275	-0.0602323	0.0295591	-0.0378004	0.13149		0.00862706	0.180076	-0.191722
												9	0.112104	0.378122	0.0314326	0.0592685	0.0265146	0.335243		0.0528359	0.351608	-0.303811
												10	0.0682783	0.308582	-0.169597	0.0814756	-0.258196	0.305096		-0.0131974	0.566778	-0.474692
												11	0.0848174	0.319526	-0.00424983	0.093251	-0.0519212	0.438861		-0.00843362	0.371447	-0.443111
												12	-0.0201013	0.0946027	-0.0185674	0.00251881	-0.0961199	0.237616		-0.0226201	0.190723	-0.256183
												13	-0.019244	0.063684	0.0318787	0.0705796	-0.0813692	0.292688		-0.0898236	0.145053	-0.26081
												14	-0.0283562	0.270798	-0.00137211	-0.0645526	-0.103846	0.230202		0.0361965	0.374644	-0.231574
												15	0.142458	0.134465	-0.0108946	0.00648417	-0.0446883	0.207324		0.135974	0.179153	-0.218219
												16	0.295844	0.338861	-0.0101739	0.255667	-0.0914618	0.273632		0.0401774	0.430323	-0.283806
												17	0.13445	0.202553	0.0864065	0.0295193	0.0383014	0.375327		0.10493	0.164252	-0.28892
												18	0.0680445	0.173591	0.0983776	0.189451	0.120044	0.292075		-0.121407	0.053547	-0.193698
												19	0.232677	0.0884719	0.0219722	0.170175	0.100265	0.206944		0.0625013	-0.0117929	-0.184972
												20	-0.0320552	0.193415	-0.057325	-0.030874	-0.105062	0.27571		-0.00118119	0.298477	-0.333035
												21	0.107064	0.0923182	-0.0135954	0.107575	0.0257596	0.0688098		-0.000510957	0.0665587	-0.0824052
												22	-0.000703911	0.180449	0.0168651	-0.0650368	-0.00566488	0.242187		0.0643329	0.186114	-0.225322
												23	0.132555	0.252917	-0.00731681	0.0287356	-0.0245317	0.364388		0.10382	0.277449	-0.371705
												24	-0.0626285	0.0501679	-0.0313693	-0.139129	-0.103066	0.233828		0.076501	0.153234	-0.265198
												mean	0.0881965	0.210471	0.000708444	0.0616407	-0.0292005	0.266553	mean	0.0265558	0.239672	-0.265845
												DiffCur_Pros	0.0427255	1.00787e-08	3.90914e-12				Stdev	0.0606448	0.135114	0.0996
																			Cohen's d'	0.437891	1.77386	-2.66913
