# Supplementary material for: Current and future goals are represented in opposite patterns in object-selective cortex
Source: eLife journal article supplement (doi:10.7554/elife.38677), 2018-11-05
Supplement: supp [file FigureS2_CrossTemporalGeneralization.xlsx]

## Sheet: CrossTemporalGeneralization
Current																		Cluster p-values
		Cue	D1_1	D1_2	D1_3	D1_4	Search1	D2_1	D2_2	D2_3	D2_4	Search2	D3_1	D3_2	D3_3	D3_4			Cue	D1_1	D1_2	D1_3	D1_4	Search1	D2_1	D2_2	D2_3	D2_4	Search2	D3_1	D3_2	D3_3	D3_4
	Cue	0.355035	0.367188	0.375868	0.352431	0.334201	0.334201	0.365451	0.349826	0.333333	0.326389	0.322917	0.322917	0.311632	0.315972	0.350694		Cue	1	1	0.0024	1	1	1	0	1	1	1	1	1	1	1	1
	D1_1	0.344618	0.446181	0.480035	0.413194	0.362847	0.352431	0.407986	0.49566	0.453125	0.357639	0.297743	0.293403	0.282986	0.265625	0.28559		D1_1	1	0.0024	0.0024	0.0024	1	1	0	0	0	1	0.0105	0.0105	0.0105	0.0105	0.0105
	D1_2	0.361979	0.473958	0.532118	0.46875	0.400174	0.34809	0.427083	0.536458	0.493924	0.391493	0.28559	0.302951	0.279514	0.260417	0.275174		D1_2	1	0.0024	0.0024	0.0024	0.0024	1	0	0	0	0	0.0105	0.0105	0.0105	0.0105	0.0105
	D1_3	0.340278	0.40625	0.456597	0.447917	0.397569	0.342882	0.388889	0.490451	0.444444	0.382812	0.321181	0.326389	0.300347	0.278646	0.289062		D1_3	1	0.0024	0.0024	0.0024	0.0024	1	0	0	0	0	1	1	1	0.0105	0.0105
	D1_4	0.349826	0.376736	0.394097	0.420139	0.394097	0.348958	0.365451	0.408854	0.401042	0.376736	0.368924	0.322049	0.306424	0.30816	0.304688		D1_4	1	0.0024	0.0024	0.0024	0.0024	1	0	0	0	0	0	1	1	1	0.0105
	Search1	0.359375	0.346354	0.364583	0.34375	0.355903	0.362847	0.355035	0.384549	0.374132	0.313368	0.335069	0.324653	0.310764	0.320312	0.31684		Search1	1	1	1	1	1	1	1	0	0	1	1	1	1	1	1
	D2_1	0.328993	0.402778	0.436632	0.399306	0.360243	0.344618	0.4375	0.473958	0.446181	0.361979	0.322049	0.313368	0.270833	0.28559	0.302951		D2_1	1	0	0	0	1	1	0	0	0	1	1	1	0.0109	0.0109	0.0109
	D2_2	0.335069	0.466146	0.522569	0.454861	0.377604	0.37066	0.440104	0.575521	0.523438	0.393229	0.334201	0.302083	0.284722	0.273438	0.252604		D2_2	1	0	0	0	0	0	0	0	0	0	1	0.0109	0.0109	0.0109	0.0109
	D2_3	0.330729	0.44184	0.499132	0.44184	0.388889	0.378472	0.422743	0.559896	0.541667	0.404514	0.295139	0.322917	0.291667	0.261285	0.276042		D2_3	1	0	0	0	0	0	0	0	0	0	0.0109	1	0.0109	0.0109	0.0109
	D2_4	0.325521	0.322917	0.390625	0.371528	0.37066	0.335069	0.351562	0.390625	0.407986	0.421007	0.346354	0.313368	0.298611	0.318576	0.322049		D2_4	1	1	0	0	0	1	1	0	0	0	1	1	0.0109	1	1
	Search2	0.306424	0.282986	0.286458	0.289931	0.352431	0.33941	0.329861	0.277778	0.290799	0.352431	0.37934	0.342014	0.338542	0.375868	0.353299		Search2	1	0.0066	0.0066	0.0066	1	1	1	0.007	0.007	1	0	1	1	1	1
	D3_1	0.304688	0.263889	0.304688	0.304688	0.3125	0.329861	0.301215	0.280382	0.307292	0.341146	0.335938	0.342882	0.338542	0.344618	0.37066		D3_1	0.0066	0.0066	0.0066	0.0066	1	1	0.007	0.007	1	1	1	1	1	1	1
	D3_2	0.314236	0.262153	0.263889	0.296875	0.310764	0.295139	0.291667	0.253472	0.243056	0.296875	0.355035	0.346354	0.366319	0.344618	0.364583		D3_2	1	0.0066	0.0066	1	1	0.007	0.007	0.007	0.007	0.007	1	1	1	1	1
	D3_3	0.324653	0.248264	0.248264	0.286458	0.307292	0.324653	0.269097	0.25434	0.264757	0.300347	0.375	0.361111	0.355035	0.382812	0.381076		D3_3	1	0.0066	0.0066	0.0066	1	1	0.007	0.007	0.007	0.007	1	1	1	1	1
	D3_4	0.342882	0.297743	0.274306	0.276042	0.3125	0.327257	0.304688	0.25	0.275174	0.315972	0.351562	0.356771	0.377604	0.373264	0.362847		D3_4	1	0.0066	0.0066	0.0066	1	1	1	0.007	0.007	1	1	1	1	1	1
Prospective
		Cue	D1_1	D1_2	D1_3	D1_4	Search1	D2_1	D2_2	D2_3	D2_4	Search2	D3_1	D3_2	D3_3	D3_4			Cue	D1_1	D1_2	D1_3	D1_4	Search1	D2_1	D2_2	D2_3	D2_4	Search2	D3_1	D3_2	D3_3	D3_4
	Cue	0.337674	0.351562	0.353299	0.345486	0.315972	0.342014	0.325521	0.342014	0.318576	0.324653	0.344618	0.368056	0.344618	0.320312	0.323785		Cue	1	1	1	1	1	1	1	1	1	1	1	0	1	1	1
	D1_1	0.349826	0.432292	0.463542	0.383681	0.320312	0.328993	0.302083	0.302083	0.309028	0.30816	0.340278	0.405382	0.472222	0.446181	0.338542		D1_1	1	0	0	0	1	1	0.0238	0.0238	1	1	1	0	0	0	1
	D1_2	0.33941	0.454861	0.478299	0.427951	0.390625	0.323785	0.28559	0.28559	0.302951	0.326389	0.330729	0.436632	0.498264	0.460938	0.37066		D1_2	1	0	0	0	0	1	0.0238	0.0238	1	1	1	0	0	0	0
	D1_3	0.353299	0.376736	0.434896	0.414931	0.382812	0.327257	0.306424	0.294271	0.279514	0.335938	0.328125	0.392361	0.412326	0.421875	0.383681		D1_3	1	0	0	0	0	1	0.0238	0.0238	0.0238	1	1	0	0	0	0
	D1_4	0.302083	0.351562	0.395833	0.383681	0.351562	0.338542	0.328993	0.337674	0.325521	0.334201	0.351562	0.331597	0.359375	0.362847	0.355903		D1_4	0.9759	1	0	0	1	1	1	1	1	1	1	1	1	1	1
	Search1	0.31684	0.325521	0.330729	0.332465	0.331597	0.344618	0.322049	0.315104	0.336806	0.351562	0.317708	0.321181	0.346354	0.322917	0.324653		Search1	1	1	1	1	1	1	1	1	1	1	1	1	1	1	1
	D2_1	0.344618	0.289931	0.289931	0.296007	0.318576	0.317708	0.34375	0.346354	0.34375	0.322049	0.324653	0.304688	0.282986	0.311632	0.321181		D2_1	1	0.0398	0.0398	0.0398	1	1	1	1	1	1	1	0.0254	0.0254	1	1
	D2_2	0.335938	0.286458	0.282118	0.31684	0.31684	0.338542	0.352431	0.361111	0.340278	0.341146	0.323785	0.283854	0.282118	0.267361	0.302951		D2_2	1	0.0398	0.0398	1	1	1	1	1	1	1	1	0.0254	0.0254	0.0254	1
	D2_3	0.323785	0.326389	0.302951	0.307292	0.332465	0.302951	0.335069	0.34809	0.360243	0.378472	0.342014	0.322049	0.313368	0.288194	0.307292		D2_3	1	1	1	1	1	0.9801	1	1	1	1	1	1	1	0.0254	1
	D2_4	0.345486	0.317708	0.328993	0.298611	0.324653	0.34375	0.325521	0.346354	0.363715	0.336806	0.349826	0.307292	0.325521	0.335938	0.325521		D2_4	1	1	1	0.9989	1	1	1	1	1	1	1	1	1	1	1
	Search2	0.354167	0.337674	0.336806	0.335938	0.3125	0.328993	0.30816	0.342882	0.359375	0.354167	0.349826	0.318576	0.321181	0.329861	0.322917		Search2	1	1	1	1	1	1	1	1	1	1	1	1	1	1	1
	D3_1	0.349826	0.401042	0.408854	0.398438	0.335938	0.331597	0.317708	0.302083	0.320312	0.329861	0.31684	0.40625	0.409722	0.391493	0.354167		D3_1	1	0	0	0	1	1	1	0.035	1	1	1	0	0	0	1
	D3_2	0.317708	0.438368	0.474826	0.428819	0.341146	0.329861	0.286458	0.291667	0.298611	0.337674	0.320312	0.414062	0.564236	0.513021	0.381076		D3_2	1	0	0	0	1	1	0.035	0.035	0.035	1	1	0	0	0	0
	D3_3	0.296007	0.423611	0.434896	0.432292	0.366319	0.309028	0.302951	0.286458	0.309028	0.330729	0.330729	0.376736	0.519097	0.563368	0.394097		D3_3	0.8435	0	0	0	0	1	0.035	0.035	1	1	1	0	0	0	0
	D3_4	0.333333	0.355035	0.377604	0.372396	0.341146	0.328993	0.332465	0.333333	0.306424	0.326389	0.327257	0.338542	0.366319	0.395833	0.40191		D3_4	1	1	0	0	1	1	1	1	1	1	1	1	1	0	0
PCCP
		Cue	D1_1	D1_2	D1_3	D1_4	Search1	D2_1	D2_2	D2_3	D2_4	Search2	D3_1	D3_2	D3_3	D3_4			Cue	D1_1	D1_2	D1_3	D1_4	Search1	D2_1	D2_2	D2_3	D2_4	Search2	D3_1	D3_2	D3_3	D3_4
	Cue	0.364149	0.342882	0.334635	0.35026	0.338976	0.316406	0.357639	0.335503	0.325955	0.321615	0.33941	0.340278	0.355903	0.329427	0.310764		Cue	1	1	0.0024	1	1	1	0	1	1	1	1	1	1	1	1
	D1_1	0.346788	0.452257	0.447483	0.417535	0.369792	0.351562	0.425781	0.478733	0.447483	0.351562	0.300347	0.306424	0.275174	0.269097	0.288194		D1_1	1	0.0024	0.0024	0.0024	1	1	0	0	0	1	0.0105	0.0105	0.0105	0.0105	0.0105
	D1_2	0.358073	0.457031	0.519531	0.443142	0.386285	0.362847	0.398003	0.492622	0.480903	0.360677	0.297743	0.293837	0.27691	0.253906	0.277344		D1_2	1	0.0024	0.0024	0.0024	0.0024	1	0	0	0	0	0.0105	0.0105	0.0105	0.0105	0.0105
	D1_3	0.359809	0.392361	0.445747	0.437934	0.392795	0.335069	0.370226	0.438802	0.392361	0.381076	0.326389	0.31033	0.304688	0.290799	0.309028		D1_3	1	0.0024	0.0024	0.0024	0.0024	1	0	0	0	0	1	1	1	0.0105	0.0105
	D1_4	0.338976	0.340712	0.347656	0.381944	0.358073	0.345052	0.336372	0.335938	0.345052	0.34592	0.336372	0.309028	0.317274	0.334201	0.31467		D1_4	1	0.0024	0.0024	0.0024	0.0024	1	0	0	0	0	0	1	1	1	0.0105
	Search1	0.344618	0.318576	0.333333	0.329427	0.328559	0.338976	0.335069	0.348524	0.324219	0.323351	0.341146	0.304688	0.335938	0.331597	0.306858		Search1	1	1	1	1	1	1	1	0	0	1	1	1	1	1	1
	D2_1	0.340712	0.279514	0.292969	0.296441	0.313368	0.331597	0.320312	0.292535	0.309028	0.329861	0.328993	0.351128	0.347222	0.358073	0.34158		D2_1	1	0	0	0	1	1	0	0	0	1	1	1	0.0109	0.0109	0.0109
	D2_2	0.335069	0.292101	0.276042	0.307726	0.307726	0.312066	0.313802	0.259983	0.282552	0.319878	0.359375	0.336806	0.365017	0.352431	0.344618		D2_2	1	0	0	0	0	0	0	0	0	0	1	0.0109	0.0109	0.0109	0.0109
	D2_3	0.339844	0.320747	0.315972	0.327257	0.319878	0.354601	0.315538	0.301215	0.289931	0.315104	0.332465	0.34809	0.351128	0.34809	0.349392		D2_3	1	0	0	0	0	0	0	0	0	0	0.0109	1	0.0109	0.0109	0.0109
	D2_4	0.351128	0.31684	0.332899	0.335503	0.354601	0.346354	0.327691	0.337674	0.31684	0.323351	0.328993	0.346354	0.346788	0.338976	0.348958		D2_4	1	1	0	0	0	1	1	0	0	0	1	1	0.0109	1	1
	Search2	0.340712	0.336372	0.332465	0.341146	0.348958	0.339844	0.31684	0.33941	0.309896	0.34375	0.325955	0.334635	0.348958	0.328559	0.335503		Search2	1	0.0066	0.0066	0.0066	1	1	1	0.007	0.007	1	0	1	1	1	1
	D3_1	0.324653	0.394097	0.382812	0.377604	0.365885	0.34592	0.389757	0.434462	0.421441	0.344184	0.319444	0.323351	0.309896	0.300781	0.307726		D3_1	0.0066	0.0066	0.0066	0.0066	1	1	0.007	0.007	1	1	1	1	1	1	1
	D3_2	0.335503	0.449219	0.50217	0.442708	0.372396	0.354167	0.451389	0.576389	0.538194	0.373264	0.296875	0.301215	0.259549	0.271267	0.27908		D3_2	1	0.0066	0.0066	1	1	0.007	0.007	0.007	0.007	0.007	1	1	1	1	1
	D3_3	0.331597	0.427951	0.468316	0.420139	0.375	0.351997	0.400608	0.514323	0.528212	0.398438	0.288628	0.312066	0.275174	0.284722	0.301215		D3_3	1	0.0066	0.0066	0.0066	1	1	0.007	0.007	0.007	0.007	1	1	1	1	1
	D3_4	0.31467	0.375868	0.382378	0.371094	0.364149	0.319878	0.341146	0.401476	0.420573	0.398003	0.338108	0.313802	0.298177	0.313802	0.31901		D3_4	1	0.0066	0.0066	0.0066	1	1	1	0.007	0.007	1	1	1	1	1	1
