# Supplementary figures and images for: Current and future goals are represented in opposite patterns in object-selective cortex
Source: eLife journal article supplement (doi:10.7554/elife.38677), 2018-11-05

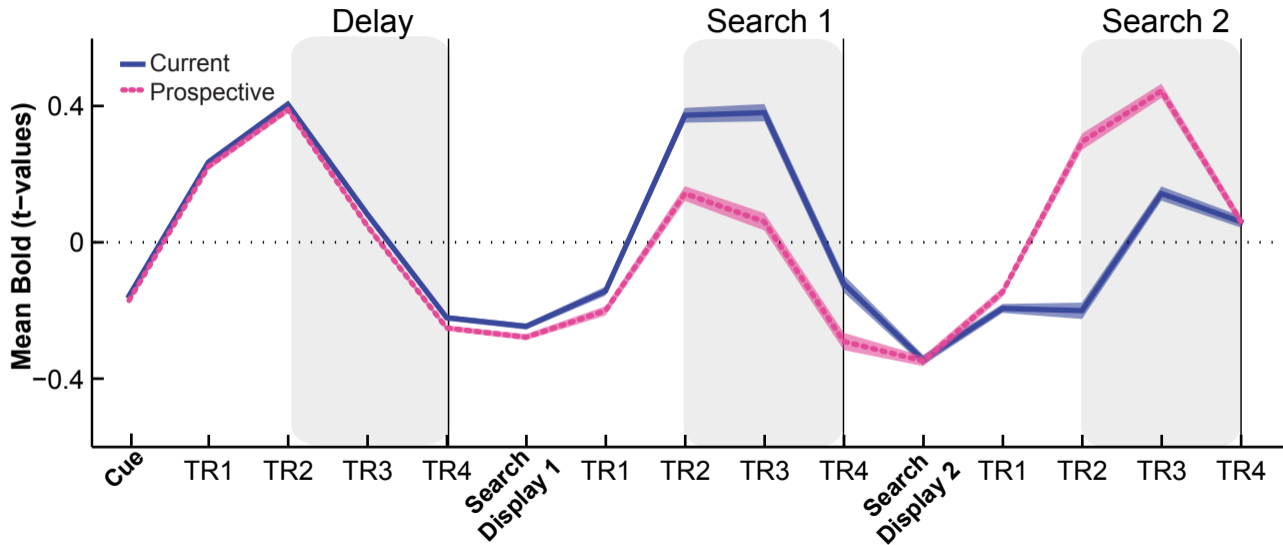

Supplement: supp [file elife_poa_e38677_Figure_2_figure_supplement_1.pdf › elife_poa_e38677_Figure_2_figure_supplement_1.pdf]

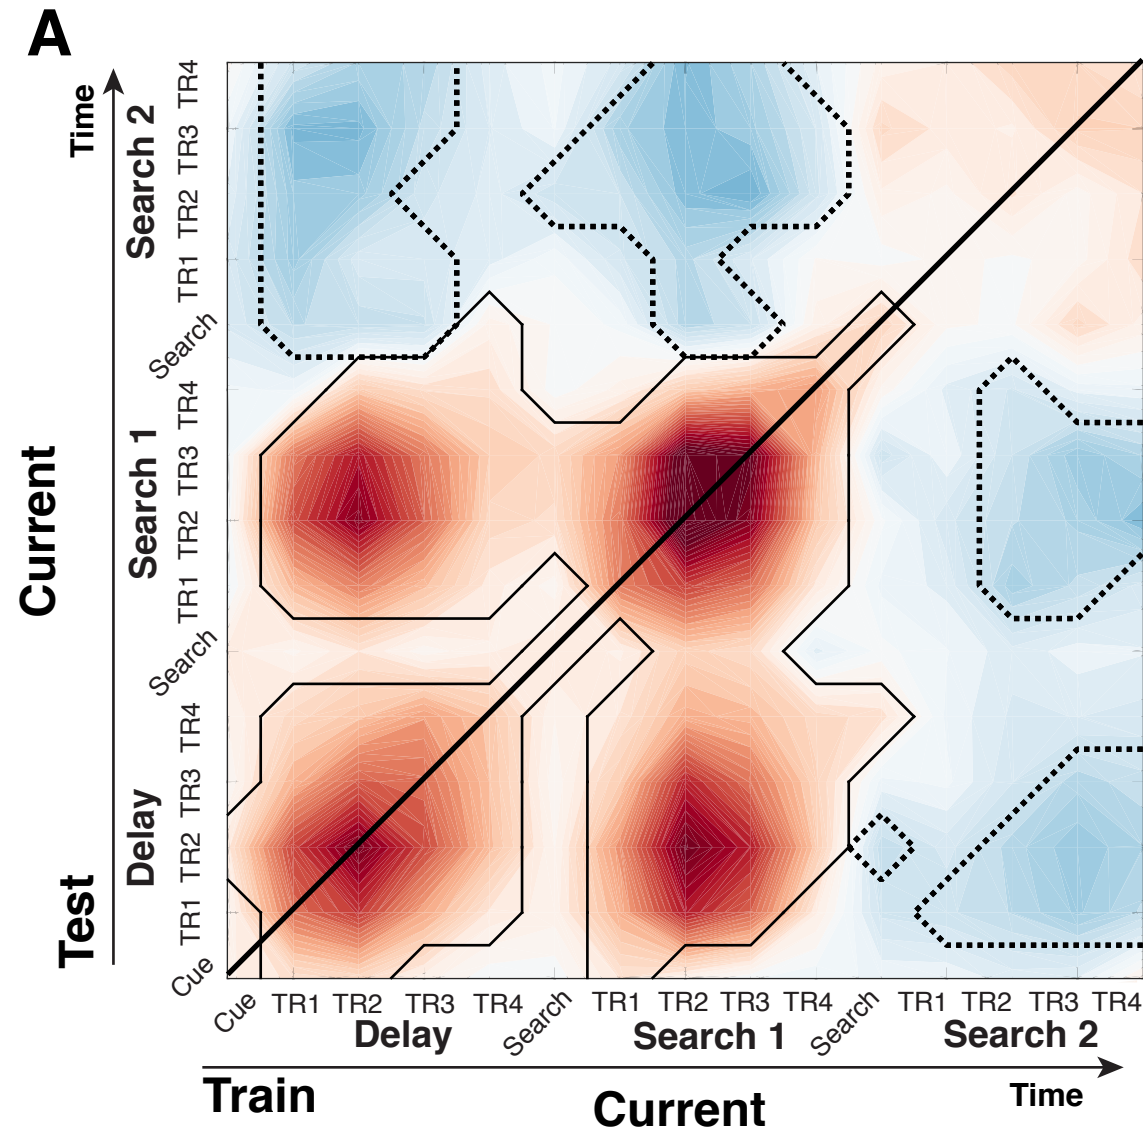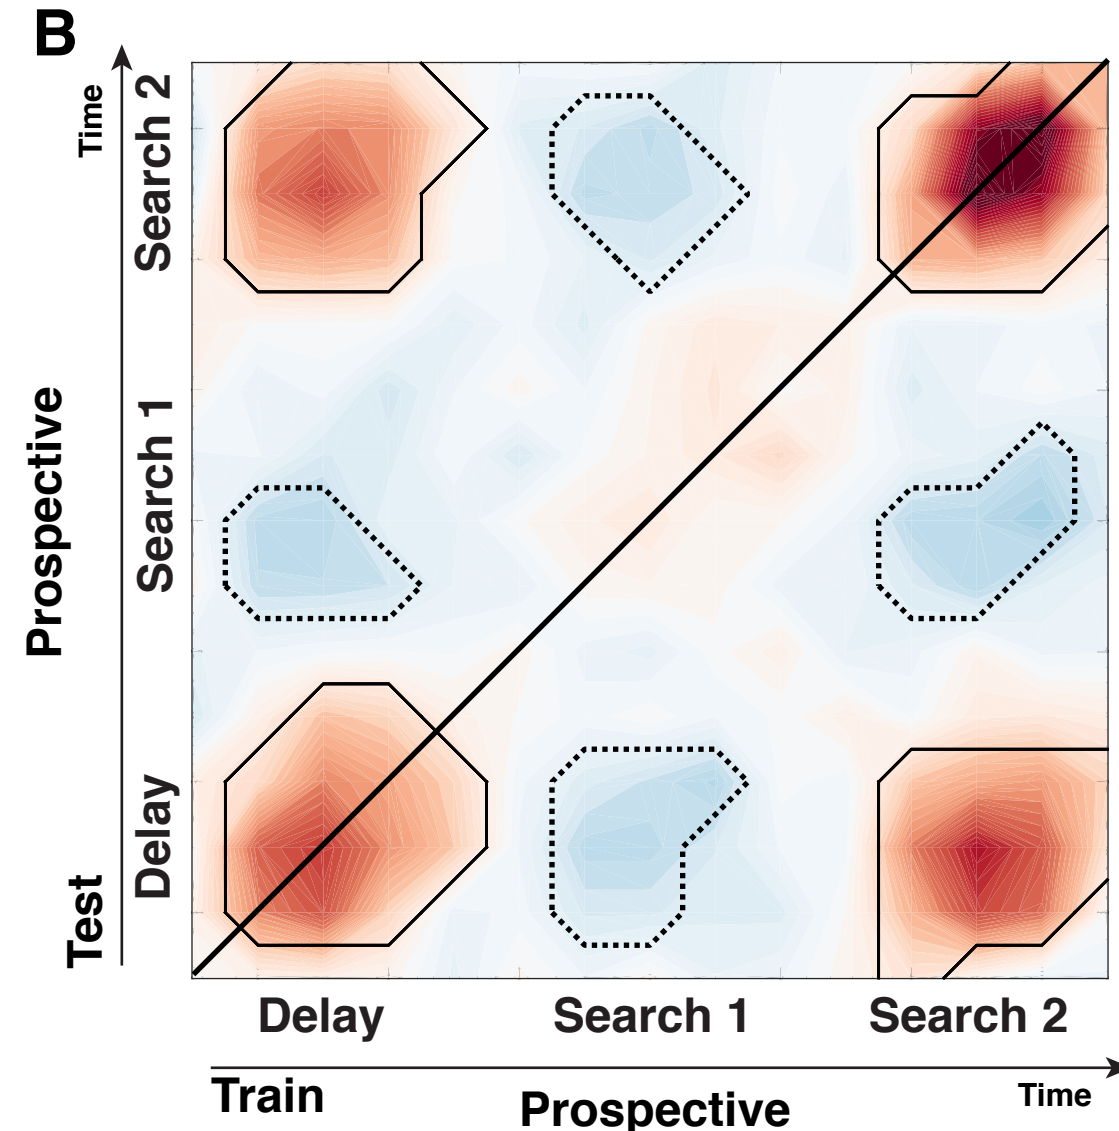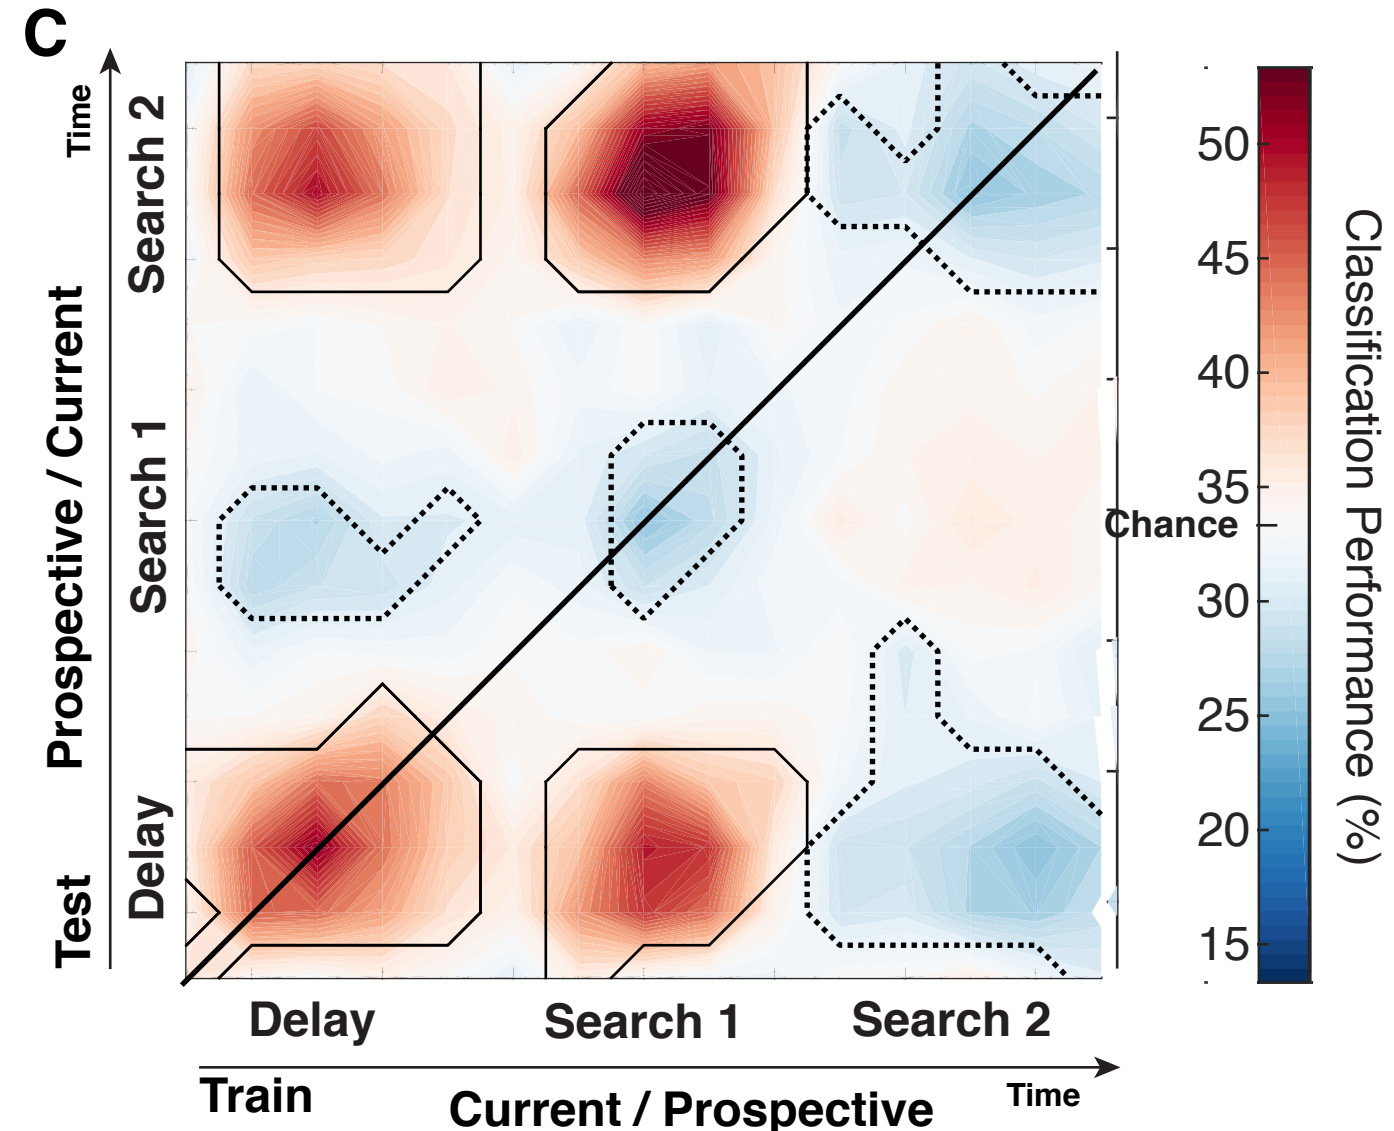

Supplement: supp [file elife_poa_e38677_Figure_2_figure_supplement_2.pdf › elife_poa_e38677_Figure_2_figure_supplement_2.pdf]

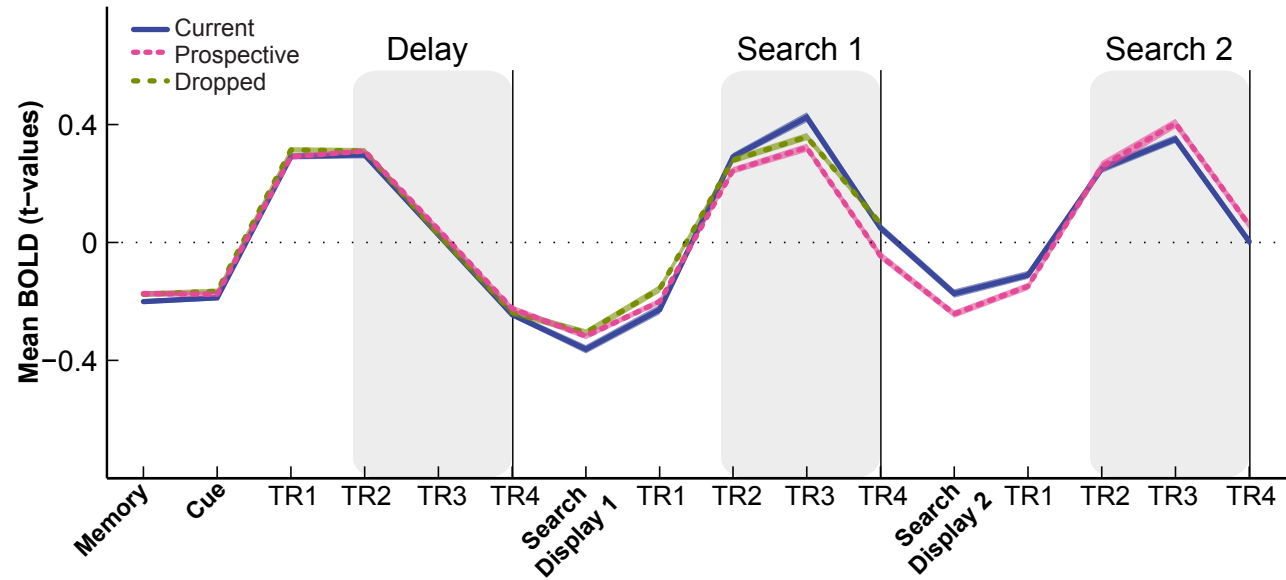

Supplement: supp [file elife_poa_e38677_Figure_4_figure_supplement_1.pdf › elife_poa_e38677_Figure_4_figure_supplement_1.pdf]
